# Supplementary material for: Enantio- and diastereoselective asymmetric allylic alkylation catalyzed by a planar-chiral cyclopentadienyl ruthenium complex
Source: Royal Society of Chemistry journal article supplement (doi:10.1039/c5cc02414e), 2015-01-01
Supplement: c5cc02414e1.pdf [file c5cc02414e1.pdf]

## Electronic Supplementary Information for

### Enantio- and diastereoselective asymmetric allylic alkylation catalyzed by planar-chiral cyclopentadienyl ruthenium complex

Naoya Kanbayashi, Kazuki Hosoda, Masanori Kato, Koichiro Takii, Taka-aki Okamura and Kiyotaka Onitsuka

Department of Macromolecular Science Graduate School of Science, Osaka University, Toyonaka, Osaka 560-0043, Japan

onitsuka@chem.sci.osaka-u.ac.jp

naokou@chem.sci.osaka-u.ac.jp

**General Information:** All reactions were carried out under Ar atmosphere using Schlenk technique, whereas the work up was performed in air. <sup>1</sup>H and <sup>13</sup>C NMR spectra were recorded in CDCl<sub>3</sub> on Varian Mercury 300, JEOL ECS400 and ECA500 spectrometers. Enantiomeric excess was determined by HPLC analysis using Shimadzu LC-10 and SPD-10AV equipped with DAICEL Chiralcel OJ-H, OD-H, OB-H and Chiralpak AD-H, AS-H columns. Optical rotation was measured on JASCO DIP-1000. HRMS measurements were carried out Thermo Fisher Scientific LTQ-Orbitrap XL.

**Materials:** All solvents used for reactions were passed through purification columns just before use. Planar-chiral Cp\*<sub>2</sub>Ru complexes **1** were prepared as reported previously.<sup>1</sup> Cinnamyl chloride **2a** was purchased from TCI. Allylic chlorides were prepared by Corey-Kim chlorination of the corresponding allylic alcohols.<sup>2</sup> All allylic chlorides were purified by distillation using glass tube oven. 1,3-Diketone (**3e**,<sup>3</sup> **3f**,<sup>4</sup> **3g**,<sup>5</sup> **3h**,<sup>6</sup> **3i**,<sup>7</sup> **3j**,<sup>8</sup> **3k**,<sup>9</sup> **3l**<sup>7</sup> and **3m**<sup>10</sup> were synthesized according to the literature procedure.

**Standard method of the catalytic reaction.** To a solution of cinnamyl chloride (**2a**: 152.6 mg, 1.0 mmol), (*S*)-**1a** (10.0 μmol, 2 mol%), NaHCO<sub>3</sub> (100.8 mg, 1.20 mmol), and MS 3A (50 mg) in THF (2.0 mL) was added 1-phenylbutene-1,3-dione (**3a**: 81 mg, 0.50 mmol). The mixture was stirred for 24 h at 25 °C. After dilution with ether, the insoluble parts were filtered off. The solvent was evaporated under reduced pressure and the residue oil was placed on a column of silica gel to give allylic compound **4a**.

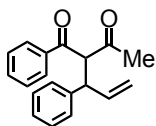

#### 1-phenyl-2-(1-phenylallyl)butane-1,3-dione (4a)

Flash chromatography over silica gel using hexane: ether (20:1) successively to give white solid (99% yield). After recrystallization of the product with hexane, the single diastereomer of **4a** was obtained in 60% yield. <sup>1</sup>H NMR (CDCl<sub>3</sub>, 300 MHz): δ 8.07 (d, 2H, *J* = 8.4 Hz, Ar), 7.64-7.47 (m, 3H, Ar), 7.36-7.18 (m, 5H, Ar), 5.83 (ddd, 1H, *J* = 17.2, 10.1, 7.0 Hz, -CH=CH<sub>2</sub>), 5.12 (d, 2H, *J* = 11.3 Hz, PhCHCH-), 4.96 (dt, 2H, *J* = 17.2, 1.2 Hz, -CH=CH<sub>2</sub>), 4.93 (dt, 1H, *J* = 10.1, 1.2 Hz, =CH<sub>2</sub>), 4.49 (dd, 1H, *J* = 11.3, 7.0 Hz, PhCH-), 1.94 (s, 3H, -CH<sub>3</sub>). <sup>13</sup>C NMR (CDCl<sub>3</sub>, 101 MHz): δ 202.5, 194.3, 139.7, 138.4, 137.1, 133.8, 128.9, 128.6, 128.3, 127.3, 116.3, 68.2, 50.0, 28.0. One carbon peak was missing due to overlapping. HPLC analysis: Chiralcel OJ-H column, 100/4 (v/v), 0.75 mL/min, 254 nm; major enantiomer *t* = 28.0 min, minor enantiomer *t* = 35.2 min. 97% ee (*S*, *S*). [α]<sub>D</sub><sup>27</sup> = -8.5 (*c* 0.11, CHCl<sub>3</sub>). Calcd for C<sub>19</sub>H<sub>18</sub>O<sub>2</sub>Na [M+Na<sup>+</sup>]: 301.1205, found: *m/z* = 301.1205.

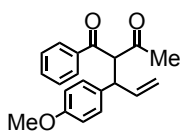

#### 1-phenyl-2-(1-(4-methoxyphenyl)allyl)butane-1,3-dione (4b)

White solid (99%). <sup>1</sup>H NMR (CDCl<sub>3</sub>, 300 MHz): major diastereomer: δ 8.07 (d, 2H, *J* = 7.2 Hz, Ar), 7.61-7.37 (m, 6H, Ar), 7.21 (d, 2H, *J* = 8.7 Hz, Ar), 6.87 (d, 2H, *J* = 8.7 Hz, Ar), 5.81 (ddd, 1H, *J* = 17.0, 10.3, 7.0 Hz, -CH=CH<sub>2</sub>), 5.21-4.90 (m, 6H, COCH-, -CH=CH<sub>2</sub>), 4.44 (dd, 1H, *J* = 11.4, 7.0 Hz, ArCH-), 3.78 (s, 3H, O-CH<sub>3</sub>), 1.95 (s, 3H, -CH<sub>3</sub>). minor diastereomer: δ 7.84 (d, 2H, *J* = 7.3 Hz, Ar), 7.61-7.37 (m, 6H, Ar), 7.11 (d, 2H, *J* = 8.7 Hz, Ar), 6.72 (d, 2H, *J* = 8.7 Hz, Ar), 5.98 (ddd, 1H, *J* = 17.0, 10.3, 7.0 Hz, -CH=CH<sub>2</sub>), 5.21-4.90 (m, 6H, COCH-, -CH=CH<sub>2</sub>), 4.38 (dd, 1H, *J* = 11.4, 7.0 Hz, ArCH-), 3.70 (s, 3H, O-CH<sub>3</sub>), 2.22 (s, 3H, -CH<sub>3</sub>). <sup>13</sup>C NMR (CDCl<sub>3</sub>, 101 MHz): δ 202.6, 194.3, 158.6, 138.7, 137.1, 133.7, 131.5, 129.3, 128.8, 128.6, 115.8, 114.3, 68.4, 55.2, 49.1, 27.9. [α]<sub>D</sub><sup>26</sup> = -6.3 (*c* 0.19, CHCl<sub>3</sub>). Calcd for C<sub>20</sub>H<sub>20</sub>O<sub>3</sub>Na [M+Na<sup>+</sup>]: 331.1310, found: *m/z* = 331.1306.

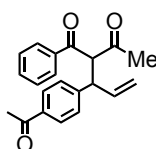

#### 1-phenyl-2-(1-(4-acetylphenyl)allyl)butane-1,3-dione (4c)

White solid (99%). <sup>1</sup>H NMR (CDCl<sub>3</sub>, 300 MHz): major diastereomer: δ 8.08 (d, 2H, *J* = 8.3 Hz, Ar), 7.94 (d, 2H, *J* = 8.3 Hz, Ar), 7.63 (t, 1H, *J* = 7.5 Hz, Ar), 7.52 (t, 2H, *J* = 7.5 Hz, Ar), 7.40 (d, 2H, *J* = 7.5 Hz, Ar), 5.81 (ddd, 1H, *J* = 17.2, 10.0, 7.2 Hz, -CH=CH<sub>2</sub>), 5.15 (d, 1H, *J* = 11.3 Hz, COCH-), 4.98 (d, 1H, *J* = 17.2 Hz, CH=CH<sub>2</sub>), 4.98 (d, 1H, *J* = 10.8 Hz, CH=CH<sub>2</sub>), 4.56 (dd, 1H, *J* = 11.3, 7.2 Hz, ArCH-), 2.59 (s, 3H, CH<sub>3</sub>CO-), 1.95 (s, 3H, CH<sub>3</sub>). minor diastereomer: δ 7.86 (d, 2H, *J* = 8.5 Hz, Ar), 7.79 (d, 2H, *J* = 8.5 Hz, Ar), 7.52 (t, 1H, *J* = 8.3 Hz, Ar), 7.40 (t, 2H, *J* = 8.3 Hz, Ar), 7.31 (d, 2H, *J* = 8.3 Hz, Ar), 5.98 (ddd, 1H, *J* = 17.0, 10.2, 8.5 Hz, -CH=CH<sub>2</sub>), 5.22 (d, 1H, *J* = 17.0 Hz, CH=CH<sub>2</sub>), 5.16 (d, 1H, *J* = 10.2 Hz, CH=CH<sub>2</sub>), 5.09 (d, 1H, *J* = 11.2 Hz, COCH-), 4.50 (dd, 1H, *J* = 11.2, 8.5 Hz, ArCH-), 2.50 (s, 3H, CH<sub>3</sub>CO-), 2.23 (s, 3H, CH<sub>3</sub>). <sup>13</sup>C NMR (CDCl<sub>3</sub>, 126 MHz): δ 202.7, 194.3, 158.6, 138.7, 137.1, 133.7, 131.5, 129.3, 128.8, 128.6, 128.5, 115.8, 114.3, 68.4, 55.2, 49.1, 27.9. HPLC analysis: Chiralcel OD-H column, 100/1 (v/v), 1.0 mL/min, 254 nm; major enantiomer *t* = 59.4 min, minor enantiomer *t* = 48.9 min. 93% ee. [α]<sub>D</sub><sup>28</sup> = -16.0 (*c* 0.20, CHCl<sub>3</sub>). HRMS (ESI): Calcd for C<sub>21</sub>H<sub>20</sub>O<sub>3</sub>Na [M+Na<sup>+</sup>]: 343.1310, found: *m/z* = 343.1309.

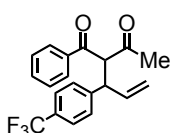

#### 1-phenyl-2-(1-(4-(trifluoromethyl)phenyl)allyl)butane-1,3-dione (4d)

White solid (99%). <sup>1</sup>H NMR (CDCl<sub>3</sub>, 300 MHz): major diastereomer: δ 8.08-8.05 (m, 2H, Ar), 7.65-7.31 (m, 7H, Ar), 5.80 (ddd, 1H, *J* = 17.6, 9.7, 7.0 Hz, -CH=CH<sub>2</sub>), 5.13 (d, 1H, *J* = 11.4 Hz, COCH-), 4.98 (d, 1H, *J* = 9.7 Hz, -CH=CH<sub>2</sub>), 4.97 (d, 1H, *J* = 17.6 Hz, -CH=CH<sub>2</sub>), 4.56 (dd, 1H, *J* = 11.4, 7.0 Hz, ArCH-), 1.98 (s, 3H, -CH<sub>3</sub>). minor diastereomer: δ 7.86-7.83 (m, 2H, Ar), 7.65-7.31 (m, 7H, Ar), 5.97 (ddd, 1H, *J* = 17.9, 9.7, 7.0 Hz, -CH=CH<sub>2</sub>), 5.21 (d, 1H, *J* = 17.9 Hz, -CH=CH<sub>2</sub>), 5.06 (d, 1H, *J* = 11.1 Hz, COCH-), 4.49 (dd, 1H, *J* = 11.1, 7.0 Hz, ArCH-), 2.22 (s, 3H, -CH<sub>3</sub>). One proton peak of minor diastereomer was missing due to overlapping with major diastereomer. <sup>13</sup>C NMR (CDCl<sub>3</sub>, 101 MHz): δ 201.7, 193.8, 144.0, 137.4, 136.8, 133.9, 129.4 (q, *J* = 30.8 Hz), 128.9, 128.8, 128.6, 125.7, 123.94 (q, *J* = 273.3 Hz) 117.1, 67.7, 49.5, 28.2. HPLC analysis: Chiralpak AD-H column, 100/4 (v/v), 0.75 mL/min, 254 nm; major enantiomer *t* = 12.8 min, minor enantiomer *t* = 13.6 min. 92% ee. [α]<sub>D</sub><sup>26</sup> = -49.8 (*c* 0.18, CHCl<sub>3</sub>). HRMS (ESI): Calcd for C<sub>20</sub>H<sub>17</sub>F<sub>3</sub>O<sub>2</sub>Na [M+Na<sup>+</sup>]: 369.1078, found: *m/z* = 369.1079.

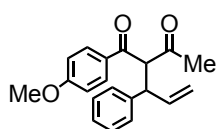

**1-(4-methoxyphenyl)-2-(1-phenylallyl)butane-1,3-dione (4e)**

White solid (99%). <sup>1</sup>H NMR (CDCl<sub>3</sub>, 300 MHz): major diastereomer: δ 8.07 (d, 2H, *J* = 9.1 Hz, Ar), 7.38-7.18 (m, 5H, Ar), 6.96 (d, 2H, *J* = 9.1 Hz, Ar), 5.82 (ddd, 1H, *J* = 17.1, 10.1, 7.0 Hz, -CH=CH<sub>2</sub>), 5.06 (d, 1H, *J* = 11.3 Hz, COCH-), 4.94 (dt, 1H, *J* = 17.1, 1.4 Hz, -CH=CH<sub>2</sub>), 4.93 (dt, 1H, *J* = 10.1, 1.4 Hz, -CH=CH<sub>2</sub>), 4.48 (dd, 1H, *J* = 11.3, 7.0 Hz, ArCH-), 3.88 (s, 3H, OCH<sub>3</sub>), 2.20 (s, 3H, -CH<sub>3</sub>). minor diastereomer: δ 7.85 (d, 2H, *J* = 9.1 Hz, Ar), 7.38-7.18 (m, 5H, Ar), 6.84 (d, 2H, *J* = 9.1 Hz, Ar), 6.06 (ddd, 1H, *J* = 17.1, 10.1, 7.0 Hz, -CH=CH<sub>2</sub>), 5.35 (dt, 1H, *J* = 17.1, 1.4 Hz, -CH=CH<sub>2</sub>), 5.20 (dt, 1H, *J* = 10.1, 1.4 Hz, -CH=CH<sub>2</sub>), 5.00 (d, 1H, *J* = 11.7 Hz, COCH-), 4.42 (dd, 1H, *J* = 11.7, 7.0 Hz, ArCH-), 3.82 (s, 3H, OCH<sub>3</sub>), 1.94 (s, 3H, CH<sub>3</sub>). <sup>13</sup>C NMR (CDCl<sub>3</sub>, 101 MHz): δ 202.9, 192.4, 164.1, 139.7, 138.5, 131.3, 130.0, 128.8, 128.2, 127.1, 116.1, 114.0, 67.8, 55.5, 49.7, 27.7. HPLC analysis: Chiralpak AD-H column, 100/4 (v/v), 0.75 mL/min, 254 nm; major enantiomer *t* = 18.5 min, minor enantiomer *t* = 21.6 min. 92% ee. [α]<sub>D</sub><sup>27</sup> = -45.0 (*c* 0.27, CHCl<sub>3</sub>). Calcd for C<sub>20</sub>H<sub>20</sub>O<sub>3</sub>Na [M+Na<sup>+</sup>]: 331.1310, found: *m/z* = 331.1310.

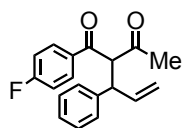

**1-(4-fluorophenyl)-2-(1-phenylallyl)butane-1,3-dione (4f)**

Yellow solid (88%). <sup>1</sup>H NMR (CDCl<sub>3</sub>, 300 MHz): major diastereomer: δ 8.12 (d, 2H, *J* = 8.8 Hz, Ar), 8.11 (d, 2H, *J* = 8.8 Hz, Ar), 7.36-7.01 (m, 5H, Ar), 5.81 (ddd, 1H, *J* = 17.3, 10.0, 7.3 Hz, -CH=CH<sub>2</sub>), 5.06 (d, 1H, *J* = 11.1 Hz, COCH-), 4.95 (d, 1H, *J* = 17.3 Hz, -CH=CH<sub>2</sub>), 4.94 (d, 1H, *J* = 10.0 Hz, -CH=CH<sub>2</sub>), 4.47 (dd, 1H, *J* = 11.1, 7.3 Hz, ArCH-), 1.94 (s, 3H, CH<sub>3</sub>). minor diastereomer: δ 7.87 (d, 2H, *J* = 8.8 Hz, Ar), 7.86 (d, 2H, *J* = 8.8 Hz, Ar), 7.36-7.01 (m, 5H, Ar), 5.99 (ddd, 1H, *J* = 17.3, 10.0, 7.3 Hz, -CH=CH<sub>2</sub>), 5.20 (d, 1H, *J* = 17.3 Hz, -CH=CH<sub>2</sub>), 5.13 (d, 1H, *J* = 10.0 Hz, -CH=CH<sub>2</sub>), 5.00 (d, 1H, *J* = 10.9 Hz, COCH-), 4.40 (dd, 1H, *J* = 10.9, 7.3 Hz, ArCH-), 2.23 (s, 3H, CH<sub>3</sub>). <sup>13</sup>C NMR (CDCl<sub>3</sub>, 101 MHz): δ 202.5, 192.7, 167.2, 164.7, 133.5, 131.7, 131.2, 128.9, 128.2, 127.4 (d, *J* = 30.8 Hz), 116.3, 116.1, 68.1, 49.9, 27.7. HPLC analysis: Chiralcel OJ-H column, 100/1 (v/v), 0.75 mL/min, 254 nm; major enantiomer *t* = 44.0 min, minor enantiomer *t* = 83.4 min. 86% ee. [α]<sub>D</sub><sup>27</sup> = 5.2 (*c* 0.14, CHCl<sub>3</sub>). Calcd for C<sub>19</sub>H<sub>17</sub>O<sub>2</sub>FNa [M+Na<sup>+</sup>]: 319.1110, found: *m/z* = 319.1109.

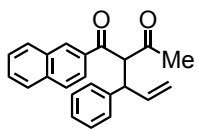**1-(naphthalen-2-yl)-2-(1-phenylallyl)butane-1,3-dione (4g)**

White solid (91%). <sup>1</sup>H NMR (CDCl<sub>3</sub>, 300 MHz): major diastereomer: δ 8.63 (s, 1H, Ar), 8.09 (d, 1H, *J* = 8.5 Hz, Ar), 8.03 (d, 1H, *J* = 8.5 Hz, Ar), 7.92 (d, 1H, *J* = 8.5 Hz, Ar), 7.88 (d, 1H, *J* = 8.5 Hz, Ar), 7.66-7.51 (m, 2H, Ar), 7.38-7.03 (m, 5H, Ar), 5.86 (ddd, *J* = 17.1, 10.1, 7.0 Hz, -CH=CH<sub>2</sub>), 5.28 (d, *J* = 11.4 Hz, COCH-), 4.99 (d, 1H, *J* = 17.1 Hz, -CH=CH<sub>2</sub>), 4.94 (d, 1H, *J* = 10.1 Hz, -CH=CH<sub>2</sub>), 4.55 (dd, 1H, *J* = 11.4, 7.0 Hz, ArCH-), 1.99 (s, 3H, CH<sub>3</sub>). minor diastereomer: δ 8.42 (s, 1H, Ar), 7.66-7.51 (m, 2H, Ar), 7.38-7.03 (m, 2H, Ar), 6.12-5.98 (m, 1H, -CH=CH<sub>2</sub>), 5.36 (d, 1H, *J* = 17.3 Hz, -CH=CH<sub>2</sub>), 5.22 (d, 1H, *J* = 11.4 Hz, COCH-), 5.15 (d, 1H, *J* = 10.3 Hz, -CH=CH<sub>2</sub>), 4.48 (dd, 1H, *J* = 11.4, 7.0 Hz, ArCH-), 2.26 (s, 3H, CH<sub>3</sub>). Four proton peaks of minor diastereomer were missing due to overlapping with major diastereomer. <sup>13</sup>C NMR (CDCl<sub>3</sub>, 126 MHz): δ 202.6, 194.1, 139.6, 138.4, 135.7, 134.4, 132.4, 131.0, 129.8, 129.0, 128.9, 128.8, 128.3, 127.7, 127.2, 126.9, 124.0, 116.3, 68.2, 50.0, 27.9. HPLC analysis: Chiralcel OD-H column, 100/2 (v/v), 0.75 mL/min, 254 nm; major enantiomer *t* = 19.5 min, minor enantiomer *t* = 17.6 min. 84% ee. [α]<sub>D</sub><sup>27</sup> = -97.4 (*c* 0.14, CHCl<sub>3</sub>). Calcd for C<sub>23</sub>H<sub>20</sub>O<sub>2</sub>Na [M+Na<sup>+</sup>]: 351.1361, found: *m/z* = 351.1361.

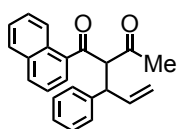**1-(naphthalen-1-yl)-2-(1-phenylallyl)butane-1,3-dione (4h)**

Colorless oil (92%). <sup>1</sup>H NMR (CDCl<sub>3</sub>, 300 MHz): δ major diastereomer: δ 8.59 (d, 1H, Ar), 8.13 (d, 1H, *J* = 7.3 Hz, Ar), 8.04 (d, 1H, *J* = 7.3 Hz, Ar), 7.90 (d, 1H, *J* = 7.3 Hz, Ar), 7.66-7.05 (m, 7H, Ar), 5.90 (ddd, *J* = 17.2, 10.0, 7.6 Hz, -CH=CH<sub>2</sub>), 5.17 (d, *J* = 11.4 Hz, COCH-), 5.10 (d, 1H, *J* = 17.2 Hz, -CH=CH<sub>2</sub>), 4.97 (d, 1H, *J* = 10.0 Hz, -CH=CH<sub>2</sub>), 4.56 (dd, 1H, *J* = 11.4, 7.6 Hz, ArCH-), 2.04 (s, 3H, CH<sub>3</sub>). minor diastereomer: δ 7.99 (d, 1H, *J* = 7.3 Hz, Ar), 7.79 (d, 1H, *J* = 7.3 Hz, Ar), 7.66-7.05 (m, 7H, Ar), 6.10-5.96 (m, 1H, -CH=CH<sub>2</sub>), 5.15 (d, 1H, *J* = 10.0 Hz, -CH=CH<sub>2</sub>), 5.08 (d, 1H, *J* = 11.1 Hz, COCH-), 4.49 (dd, 1H, *J* = 11.1, 7.6 Hz, ArCH-), 2.34 (s, 3H, CH<sub>3</sub>). Three proton peaks of minor diastereomer were missing due to overlapping with major diastereomer. <sup>13</sup>C NMR (CDCl<sub>3</sub>, 126 MHz): δ 202.9, 197.2, 139.7, 138.3, 133.9, 133.7, 133.2, 130.1, 129.8, 128.9, 128.4, 127.2, 126.7, 125.6, 124.3, 116.6, 71.5, 51.1, 28.4. Two carbon peaks were missing due to overlapping. HPLC analysis: Chiralcel OJ-H column, 200/1 (v/v), 1.0 mL/min, 254 nm; major enantiomer *t* = 106.8 min, minor enantiomer *t* = 90.2 min. 90% ee. [α]<sub>D</sub><sup>27</sup> = 15.7 (*c* 0.12, CHCl<sub>3</sub>). Calcd for C<sub>23</sub>H<sub>20</sub>O<sub>2</sub>Na [M+Na<sup>+</sup>]: 351.1361, found: *m/z* = 351.1360.

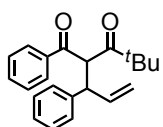**4,4-dimethyl-1-phenyl-2-(1-phenylallyl)pentane-1,3-dione (4i)**

White solid (79%). <sup>1</sup>H NMR (CDCl<sub>3</sub>, 300 MHz): major diastereomer: δ 8.07 (d, 2H, *J* = 7.3 Hz, Ar), 7.61 (t, 1H, *J* = 7.3 Hz, Ar), 7.53 (t, 1H, *J* = 7.3 Hz, Ar), 7.33-7.26 (m, 4H, Ar), 5.90 (ddd, 1H, *J* = 16.8, 10.0, 8.9 Hz, -CH=CH<sub>2</sub>), 5.51 (d, 1H, *J* = 11.0 Hz, COCH-), 4.98 (d, 1H, *J* = 16.8 Hz, -CH=CH<sub>2</sub>), 4.84 (d, 1H, *J* = 10.0 Hz, -CH=CH<sub>2</sub>), 4.43 (dd, 1H, *J* = 11.0, 8.9 Hz, ArCH-), 1.06 (s, 9H, <sup>t</sup>Bu). minor diastereomer: δ 7.69 (d, 2H, *J* = 7.3 Hz, Ar), 7.42 (t, 1H, *J* = 7.3 Hz, Ar), 7.33-7.26 (m, 3H, Ar), 7.20 (t, 1H, *J* = 7.3 Hz, Ar), 7.10 (t, 2H, *J* = 7.3 Hz, Ar), 6.99 (t, 1H, *J* = 7.3 Hz, Ar), 6.12 (ddd, 1H, *J* = 16.8, 10.5, 8.5 Hz, -CH=CH<sub>2</sub>), 5.47 (d, 1H, *J* = 10.3 Hz, COCH-), 5.09 (d, 1H, *J* = 10.5 Hz, -CH=CH<sub>2</sub>), 5.08 (d, 1H, *J* = 16.9 Hz, -CH=CH<sub>2</sub>), 4.40 (dd, 1H, *J* = 10.3, 8.5 Hz, ArCH-), 0.77 (s, 9H, <sup>t</sup>Bu). <sup>13</sup>C NMR

(CDCl<sub>3</sub>, 101 MHz):  $\delta$  206.4, 194.0, 141.3, 137.5, 137.2, 133.3, 128.8, 128.7, 128.4, 128.2, 126.8, 117.3, 60.5, 52.4, 44.8, 25.8. HPLC analysis: Chiralcel OJ-H column, 100/1 (v/v), 0.75 mL/min, 254 nm; major enantiomer  $t = 14.6$  min, minor enantiomer  $t = 13.9$  min. 70% ee.  $[\alpha]_D^{27} = -161.9$  ( $c$  0.15, CHCl<sub>3</sub>). Calcd for C<sub>22</sub>H<sub>24</sub>O<sub>2</sub>Na [M+Na<sup>+</sup>]: 343.1674, found:  $m/z = 343.1673$ .

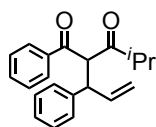

**4-methyl-1-phenyl-2-(1-phenylallyl)pentane-1,3-dione (4j)**

White solid (93%). <sup>1</sup>H NMR (CDCl<sub>3</sub>, 300 MHz): major diastereomer:  $\delta$  8.08 (d, 2H,  $J = 7.1$  Hz, Ar), 7.60 (t, 1H,  $J = 7.1$  Hz, Ar), 7.50 (t, 2H,  $J = 7.1$  Hz, Ar), 7.38-7.13 (m, 5H, Ar), 5.86 (ddd, 1H,  $J = 17.1, 10.1, 7.6$  Hz, -CH=CH<sub>2</sub>), 5.27 (d, 1H,  $J = 11.0$  Hz, COCH-), 4.97 (dt, 1H,  $J = 17.1, 1.1$  Hz, -CH=CH<sub>2</sub>), 4.92 (dt, 1H,  $J = 10.0, 1.1$  Hz, -CH=CH<sub>2</sub>), 4.52 (dd, 1H,  $J = 11.0, 7.6$  Hz, ArCH-), 2.57 (hept, 1H,  $J = 6.9$  Hz, CH), 0.66 (d, 3H,  $J = 6.9$  Hz, CH<sub>3</sub>), 0.64 (d, 3H,  $J = 6.9$  Hz, CH<sub>3</sub>). minor diastereomer:  $\delta$  7.80 (d, 2H,  $J = 7.1$  Hz, Ar), 7.49 (t, 1H,  $J = 7.1$  Hz, Ar), 7.38-7.03 (m, 7H, Ar), 6.01 (ddd, 1H,  $J = 17.1, 10.1, 8.2$  Hz, -CH=CH<sub>2</sub>), 5.22 (d, 1H,  $J = 11.0$  Hz, COCH-), 5.11 (dt, 1H,  $J = 17.1, 1.1$  Hz, -CH=CH<sub>2</sub>), 5.09 (d, 1H,  $J = 10.1, 1.1$  Hz, -CH=CH<sub>2</sub>), 4.47 (dd, 1H,  $J = 11.0, 8.2$  Hz, ArCH-), 2.87 (hept, 1H,  $J = 6.9$  Hz, CH), 1.00 (d, 3H,  $J = 6.9$  Hz, CH<sub>3</sub>), 0.99 (d, 3H,  $J = 6.9$  Hz, CH<sub>3</sub>). <sup>13</sup>C NMR (CDCl<sub>3</sub>, 101 MHz):  $\delta$  207.3, 194.0, 140.4, 138.1, 137.3, 133.5, 128.8, 128.6, 128.4, 126.9, 116.4, 66.2, 50.3, 40.4, 18.5, 17.7. HPLC analysis: Chiralpak AD-H column, 100/1 (v/v), 0.75 mL/min, 254 nm; major enantiomer  $t = 17.4$  min, minor enantiomer  $t = 18.9$  min. 94% ee.  $[\alpha]_D^{26} = -63.3$  ( $c$  0.11, CHCl<sub>3</sub>). Calcd for C<sub>21</sub>H<sub>22</sub>O<sub>2</sub>Na [M+Na<sup>+</sup>]: 329.1518, found:  $m/z = 329.1518$ .

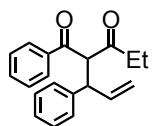

**1-phenyl-2-(1-phenylallyl)pentane-1,3-dione (4k)**

Colorless oil (84%). <sup>1</sup>H NMR (CDCl<sub>3</sub>, 300 MHz): major diastereomer:  $\delta$  8.07 (d, 2H,  $J = 7.3$  Hz, Ar), 7.60 (t, 1H,  $J = 7.3$  Hz, Ar), 7.50 (t, 2H,  $J = 7.3$  Hz, Ar), 7.39-7.17 (m, 5H, Ar), 5.85 (ddd, 1H,  $J = 17.2, 10.1, 7.2$  Hz, -CH=CH<sub>2</sub>), 5.14 (d, 1H,  $J = 11.4$  Hz, COCH-), 4.96 (dt, 1H,  $J = 17.2, 1.1$  Hz, -CH=CH<sub>2</sub>), 4.94 (dt, 1H,  $J = 10.1, 1.1$  Hz, -CH=CH<sub>2</sub>), 4.50 (dd, 1H,  $J = 11.4, 7.2$  Hz, ArCH-), 2.29 (t, 1H,  $J = 7.3$  Hz, CH<sub>2</sub>), 2.26 (t, 1H,  $J = 7.3$  Hz, CH<sub>2</sub>), 0.68 (t, 3H,  $J = 7.3$  Hz, CH<sub>3</sub>). minor diastereomer:  $\delta$  7.83 (d, 2H,  $J = 7.3$  Hz, Ar), 7.39-7.10 (m, 7H, Ar), 5.99 (ddd, 1H,  $J = 17.2, 10.1, 7.2$  Hz, -CH=CH<sub>2</sub>), 5.10 (d, 1H,  $J = 11.4$  Hz, COCH-), 4.45 (dd, 1H,  $J = 11.4, 7.2$  Hz, ArCH-), 0.97 (t, 1H,  $J = 7.3$  Hz, CH<sub>2</sub>). Five proton peaks of minor diastereomer were missing due to overlapping with major diastereomer. <sup>13</sup>C NMR (CDCl<sub>3</sub>, 101 MHz):  $\delta$  204.8, 194.3, 139.9, 138.4, 137.1, 133.7, 128.9, 128.6, 128.5, 128.3, 127.2, 116.3, 67.5, 50.0, 34.6, 7.3. HPLC analysis: Chiralcel OJ-H column, 200/1 (v/v), 0.5 mL/min, 254 nm; major enantiomer  $t = 61.1$  min, minor enantiomer  $t = 44.5$  min. 92% ee.  $[\alpha]_D^{27} = -7.6$  ( $c$  0.18, CHCl<sub>3</sub>). Calcd for C<sub>20</sub>H<sub>20</sub>O<sub>2</sub>Na [M+Na<sup>+</sup>]: 315.1361, found:  $m/z = 315.1361$ .

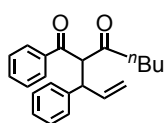

**1-phenyl-2-(1-phenylallyl)heptane-1,3-dione (4l)**

Colorless oil (127 mg, 79%). <sup>1</sup>H NMR (CDCl<sub>3</sub>, 500 MHz): major diastereomer:  $\delta$  8.07 (d, 2H,  $J = 7.5$  Hz, Ar), 7.60 (t, 1H,  $J = 7.5$  Hz, Ar), 7.50 (t, 2H,  $J = 7.5$  Hz, Ar), 7.34-7.16 (m, 5H, Ar), 5.84 (ddd, 1H,  $J = 17.0, 10.1, 7.2$  Hz, -CH=CH<sub>2</sub>), 5.15 (d, 1H,  $J = 11.0$  Hz, COCH-), 4.96 (dt, 1H,  $J = 17.0$  Hz, -CH=CH<sub>2</sub>), 4.93 (dt, 1H,  $J = 10.1$  Hz, -CH=CH<sub>2</sub>), 4.50 (dd, 1H,  $J = 11.0, 7.2$  Hz,

ArCH-), 2.25 (t, 1H,  $J = 7.3$  Hz, CH<sub>2</sub>), 1.23-1.08 (m, 2H, CH<sub>2</sub>), 0.95 (hex, 2H,  $J = 7.3$  Hz, CH<sub>2</sub>), 0.67 (t, 3H,  $J = 7.3$  Hz, CH<sub>3</sub>). minor diastereomer:  $\delta$  7.83 (d, 2H,  $J = 7.5$  Hz, Ar), 7.37 (t, 2H,  $J = 7.5$  Hz, Ar), 7.34-7.07 (m, 6H, Ar), 5.99 (ddd, 1H,  $J = 17.2, 10.1, 7.2$  Hz, -CH=CH<sub>2</sub>), 5.09 (d, 1H,  $J = 11.1$  Hz, COCH-), 4.54 (dd, 1H,  $J = 11.0, 7.2$  Hz, ArCH-), 2.56 (t, 2H,  $J = 7.3$  Hz, CH<sub>2</sub>), 1.46 (pent, 2H,  $J = 7.3$  Hz, CH<sub>2</sub>), 1.23-1.08 (m, 2H, CH<sub>2</sub>), 0.83 (t, 1H,  $J = 7.3$  Hz, CH<sub>2</sub>). <sup>13</sup>C NMR (CDCl<sub>3</sub>, 126 MHz):  $\delta$  204.3, 194.3, 139.9, 138.5, 137.2, 133.7, 128.8, 128.8, 128.4, 127.1, 116.2, 67.7, 50.0, 40.9, 25.0, 21.7, 13.6. HPLC analysis: Chiralpak AD-H column, 100/1 (v/v), 1.0 mL/min, 254 nm; major enantiomer  $t = 13.6$  min, minor enantiomer  $t = 19.2$  min. 90% ee.  $[\alpha]_D^{32} = -81.6$  (c 0.055, CHCl<sub>3</sub>). HRMS (ESI): Calcd for C<sub>22</sub>H<sub>24</sub>O<sub>2</sub>Na [M+Na<sup>+</sup>]: 343.1674, found:  $m/z = 343.1673$ .

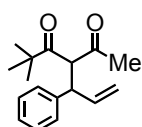

#### 5,5-dimethyl-3-(1-phenylallyl)hexane-2,4-dione (**4m**)

Colorless oil (81%). <sup>1</sup>H NMR (CDCl<sub>3</sub>, 300 MHz): major diastereomer:  $\delta$  7.39-7.14 (m, 5H, Ar), 5.78 (ddd, 1H,  $J = 17.1, 10.0, 8.0$  Hz, -CH=CH<sub>2</sub>), 5.00 (d, 1H,  $J = 17.1$  Hz, -CH=CH<sub>2</sub>), 4.98 (d, 1H,  $J = 10.1$  Hz, -CH=CH<sub>2</sub>), 4.45 (d, 1H,  $J = 11.5$  Hz, COCH-), 4.22 (dd, 1H,  $J = 11.5, 8.0$  Hz, ArCH-), 1.88 (s, 3H, CH<sub>3</sub>), 1.14 (s, 9H, <sup>t</sup>Bu). minor diastereomer:  $\delta$  7.39-7.14 (m, 5H, Ar), 6.01 (ddd, 1H,  $J = 17.2, 10.2, 9.0$  Hz, -CH=CH<sub>2</sub>), 5.20 (d, 1H,  $J = 17.2$  Hz, -CH=CH<sub>2</sub>), 5.12 (d, 1H,  $J = 10.2$  Hz, -CH=CH<sub>2</sub>), 4.61 (d, 1H,  $J = 11.3$  Hz, COCH-), 4.18 (dd, 1H,  $J = 11.3, 9.0$  Hz, ArCH-), 2.19 (s, 3H, CH<sub>3</sub>), 0.75 (s, 9H, <sup>t</sup>Bu). <sup>13</sup>C NMR (CDCl<sub>3</sub>, 101 MHz):  $\delta$  208.7, 203.5, 140.6, 138.6, 128.9, 128.1, 127.2, 116.8, 70.2, 51.8, 45.8, 27.4, 26.0. HPLC analysis: Chiralcel OJ-H column, 100/1 (v/v), 0.75 mL/min, 254 nm; major enantiomer  $t = 11.5$  min, minor enantiomer  $t = 15.2$  min. 92% ee.  $[\alpha]_D^{26} = -15.4$  (c 0.12, CHCl<sub>3</sub>). Calcd for C<sub>17</sub>H<sub>22</sub>O<sub>2</sub>Na [M+Na<sup>+</sup>]: 281.1518, found:  $m/z = 281.1513$ .

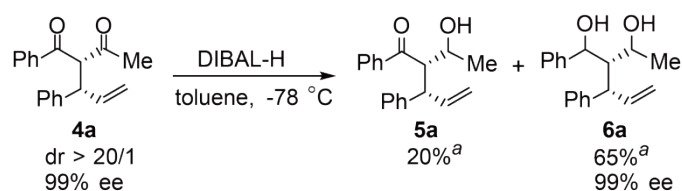

**The diastereoselective reduction of 4a:** To a toluene solution (0.25 mL) of **4a** (30 mg, 0.11 mmol) was

added dropwise a 1.0 M toluene solution of diisobutylaluminium hydride (0.5 mL, 0.5 mmol) at  $-78\text{ }^{\circ}\text{C}$ , and the mixture was stirred for 1 h. The reaction was warmed to room temperature, and stirred for 12 h. The mixture was cooled to  $-78\text{ }^{\circ}\text{C}$  and, quenched by the addition of a saturated potassium sodium tartrate solution (5.0 mL) and the mixture was allowed to warm to room temperature and stirred for 1 h. The reaction mixture was extracted with ethyl acetate. Combined organic layer was washed with brine and dried over  $\text{Na}_2\text{SO}_4$ . The solvent was removed by evaporation to give yellow oil. The oil was purified by silica gel column chromatography (eluent: dichloromethane/ethyl acetate = 8/2) to give colorless oil of **5a** (4 mg, 26%) and **6a** (20 mg, 65%).

**2-(1-hydroxyethyl)-1,3-diphenylpent-4-en-1-one (5a):** White solid (26%).  $^1\text{H}$  NMR ( $\text{CDCl}_3$ , 400 MHz):  $\delta$  7.96 (dd, 2H,  $J = 7.3, 1.3$  Hz, Ar), 7.61 (dt, 1H,  $J = 7.3, 1.3$  Hz, Ar), 7.51 (t, 2H,  $J = 7.3$  Hz, Ar), 7.38-7.35 (m, 4H, Ar), 7.20-7.23 (m, 1H, Ar), 5.89 (ddd, 1H,  $J = 16.9, 10.1, 8.9$  Hz,  $-\text{CH}=\text{CH}_2$ ), 4.97 (dt, 1H,  $J = 16.9, 1.3$  Hz,  $-\text{CH}=\text{CH}_2$ ), 4.83 (ddd, 1H,  $J = 10.1, 1.3, 0.7$  Hz,  $-\text{CH}=\text{CH}_2$ ), 4.07 (t, 1H,  $J = 11.0$  Hz,  $-\text{CHPh}$ ), 3.89 (dd, 1H,  $J = 11.0, 2.8$  Hz, CH), 3.63 (m, 1H,  $-(\text{OH})\text{CHCH}_3$ ), 3.21 (d, 1H,  $J = 10.7$  Hz,  $-(\text{OH})\text{CHCH}_3$ ), 1.05 (d, 3H,  $J = 6.6$  Hz,  $-(\text{OH})\text{CHCH}_3$ ).  $^{13}\text{C}$  NMR ( $\text{CDCl}_3$ , 101 MHz):  $\delta$  206.4, 141.4, 139.1, 138.5, 133.6, 128.8, 128.4, 128.2, 126.9, 116.7, 77.2, 67.0, 54.5, 51.0, 22.9.

**1-phenyl-2-(1-phenylallyl)butane-1,3-diol (6a):** Colorless oil (65%).  $^1\text{H}$  NMR ( $\text{CDCl}_3$ , 400 MHz):  $\delta$  7.40-7.18 (m, 10H, Ar), 5.58 (ddd, 1H,  $J = 17.0, 10.1, 8.7$  Hz,  $-\text{CH}=\text{CH}_2$ ), 5.35 (br, 1H,  $-(\text{OH})\text{CHPh}$ ), 4.82 (ddd, 1H,  $J = 17.0, 1.6, 1.1$  Hz,  $-\text{CH}=\text{CH}_2$ ), 4.69 (ddd, 1H,  $J = 10.1, 1.6, 0.7$  Hz,  $-\text{CH}=\text{CH}_2$ ), 3.98 (qd, 1H,  $J = 6.5, 2.3$  Hz,  $-(\text{OH})\text{CHCH}_3$ ), 3.91 (t, 1H,  $J = 8.5$  Hz,  $-\text{CHPh}$ ), 3.46 (br, 1H,  $-(\text{OH})\text{CHPh}$ ), 2.26 (dt, 1H,  $J = 8.5, 2.3$  Hz, CH), 1.94 (br, 1H,  $-(\text{OH})\text{CHCH}_3$ ), 1.27 (d, 3H,  $J = 6.5$  Hz,  $\text{CH}_3$ ),  $^{13}\text{C}$  NMR ( $\text{CDCl}_3$ , 101 MHz):  $\delta$  143.7, 143.6, 140.9, 128.7, 128.3, 128.0, 126.6, 126.4, 126.2, 114.8, 71.6, 68.6, 53.9, 48.0, 22.2. HPLC analysis: Chiralcel OJ-H column, 90/10 (v/v), 0.5 mL/min, 230 nm; major enantiomer  $t = 17.2$  min, minor enantiomer  $t = 21.9$  min. 99% ee.  $[\alpha]_{\text{D}}^{21} = -13.5$  ( $c$  0.16,  $\text{CHCl}_3$ ). Calcd for  $\text{C}_{19}\text{H}_{22}\text{O}_2\text{Na}$   $[\text{M}+\text{Na}^+]$ : 305.1518, found:  $m/z = 281.1515$ .

#### Determination of the relative configuration of 6a by Rychnovsky's method.

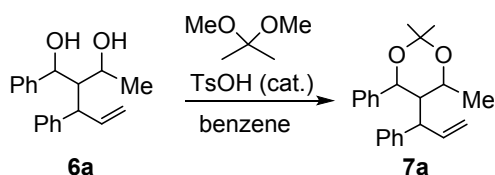

**Synthesis of 7:** A solution of **6a** (46 mg, 0.16 mmol), 2,2-dimethoxypropane (1.0 mL) and a catalytic amount of *p*-toluenesulfonic acid in benzene (1.0 mL) was stirred for 4 h at room temperature. To the solution was added sodium hydrogen carbonate aqueous solution, and the mixture was diluted with ethyl acetate, and the organic layer was washed with water and dried with  $\text{Na}_2\text{SO}_4$ . After removal of the solvents, the residue was purified by silica gel column chromatography (*n*-hexane/diethyl ether = 50/1) to give

colorless oil (50 mg, 98%).  $^1\text{H}$  NMR ( $\text{CDCl}_3$ , 400 MHz): 7.22-7.05 (m, 8H, Ar), 6.90 (d, 2H,  $J = 6.9$  Hz, Ar), 5.77 (ddd, 1H,  $J = 16.9, 10.2, 8.9$  Hz,  $-\text{CH}=\text{CH}_2$ ), 5.26 (d, 1H,  $J = 4.4$  Hz,  $-\text{CHCH}(-\text{O})\text{Ph}$ ), 4.61 (dd, 1H,  $J = 10.2, 1.4$  Hz,  $-\text{CH}=\text{CH}_2$ ), 4.56 (dd, 1H,  $J = 16.9, 1.4$  Hz,  $-\text{CH}=\text{CH}_2$ ), 3.73 (quin, 1H,  $J = 6.4$  Hz,  $-\text{CHC}(-\text{O})\text{CH}_3$ ), 3.45 (dd, 1H,  $J = 8.9, 6.4$  Hz,  $\text{PhCH}-$ ), 2.38 (td, 1H,  $J = 6.4, 4.4$  Hz,  $-\text{CH}(-\text{CH})\text{CH}-$ ), 1.40 (s, 3H,  $\text{CH}_3$ ), 1.34 (s, 3H,  $\text{CH}_3$ ), 1.16 (d, 3H,  $J = 6.4$  Hz,  $-\text{CHC}(-\text{O})\text{CH}_3$ ),  $^{13}\text{C}$  NMR ( $\text{CDCl}_3$ , 101 MHz): 145.5, 140.0, 139.8, 128.2, 128.0, 127.6, 126.4, 125.7, 114.4, 100.9, 69.9, 67.7, 53.5, 48.9, 25.8, 24.3, 21.8. Two carbon peaks were missing due to overlapping.  $[\alpha]_{\text{D}}^{25} = +10.5$  ( $c$  0.29,  $\text{CHCl}_3$ ). Calcd for  $\text{C}_{22}\text{H}_{26}\text{O}_2\text{Na}$   $[\text{M}+\text{Na}^+]$ : 345.1830, found:  $m/z = 345.1829$ .

### $^{13}\text{C}$ chemical shifts of methyl groups in 1,3-diol acetonides.

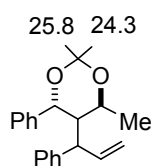

### Determination of the absolute configuration of 7 by NOE analysis.

#### 2,2,4-trimethyl-6-phenyl-5-((*S*)-1-phenylallyl)-1,3-dioxane (7)

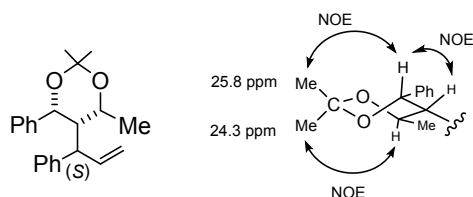



# NOESY Spectrum of 7

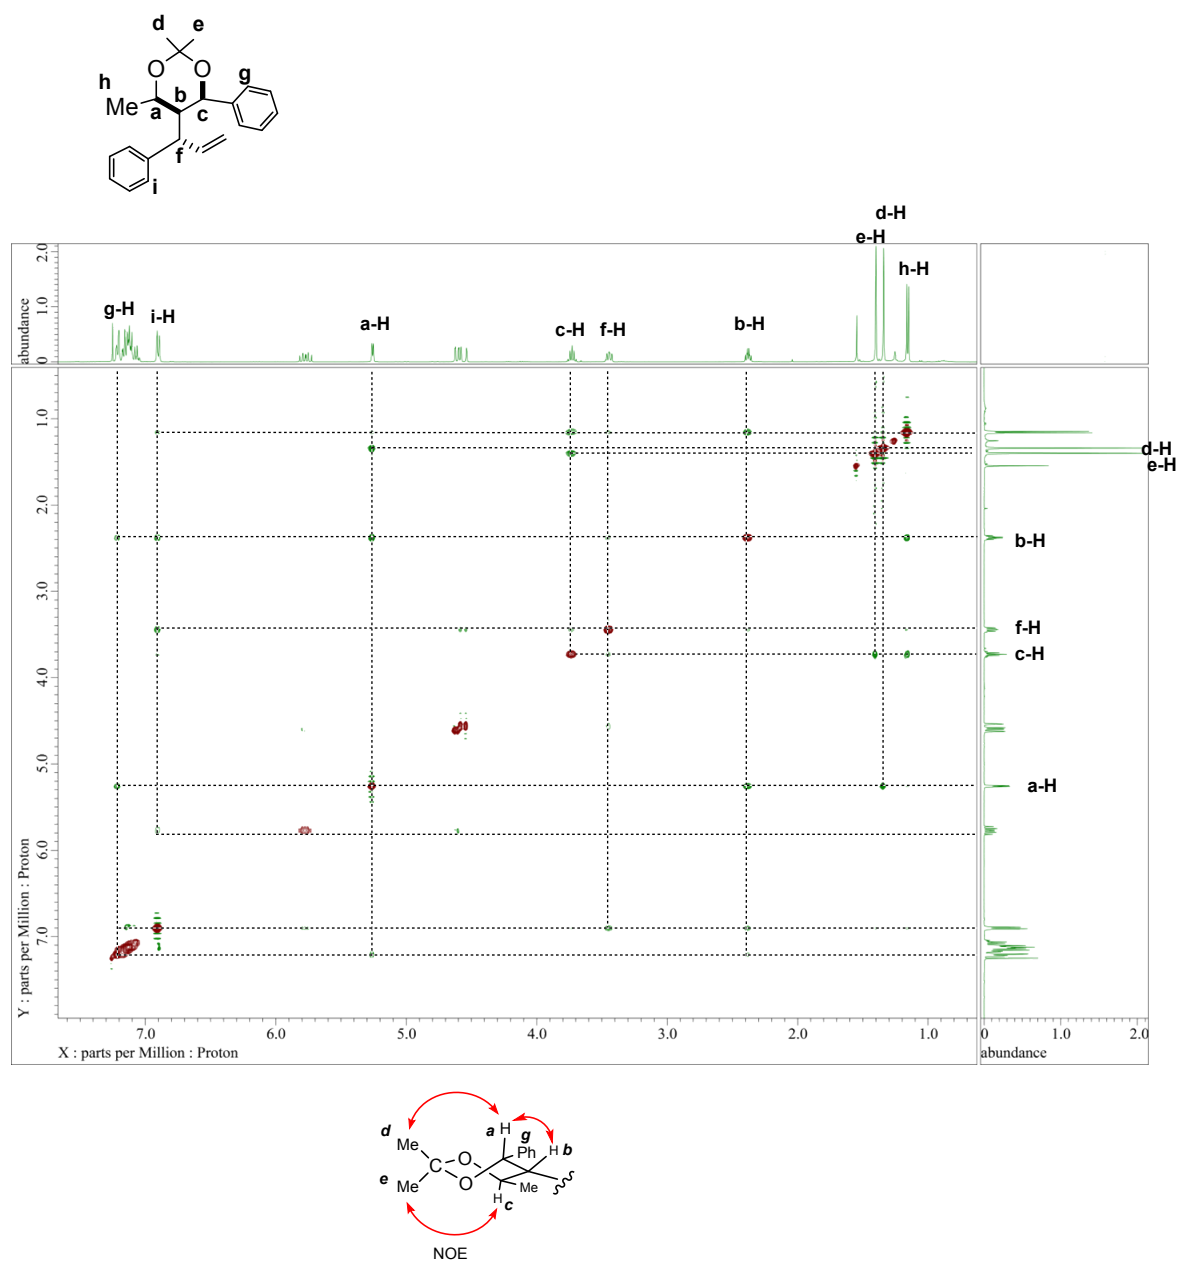

Figure S1. NOESY (400 MHz, in CDCl<sub>3</sub> at 303 K) spectrum of 7.

**Table S1.** Screening of Solvent<sup>a</sup>.

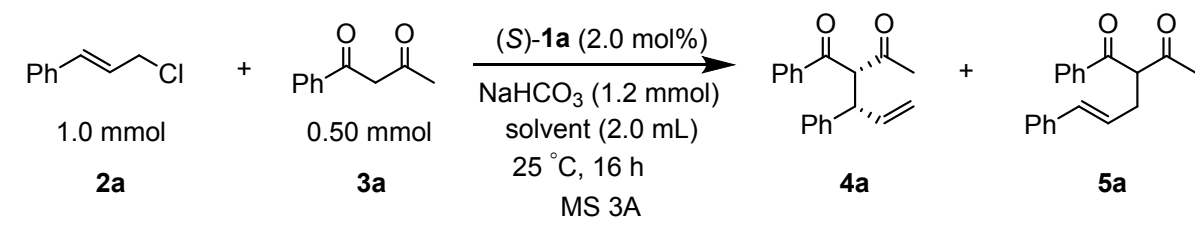

| entry | solvent                         | yield <sup>b</sup> | <b>4a/5a</b> <sup>b</sup> | dr of <b>4a</b> <sup>b</sup> | ee of <b>4a</b> <sup>c</sup> |
|-------|---------------------------------|--------------------|---------------------------|------------------------------|------------------------------|
| 1     | THF                             | 99                 | >20/1                     | 5/1                          | 97                           |
| 2     | Dioxane                         | 99                 | >20/1                     | 3/1                          | 91                           |
| 3     | DME                             | 99                 | >20/1                     | 6/1                          | 89                           |
| 4     | Acetone                         | 92                 | >20/1                     | 6/1                          | 84                           |
| 5     | DMF                             | 99                 | >20/1                     | 1/1                          | 94                           |
| 6     | CH <sub>2</sub> Cl <sub>2</sub> | 99                 | >20/1                     | 3/1                          | 79                           |
| 7     | Toluene                         | trace              | –                         | –                            | –                            |

<sup>a</sup>cat/NaHCO<sub>3</sub>/**2a**/**3a** = 0.0072/1.2/0.50/1.0 mmol in solvent (2.0 mL) at 25 °C. <sup>b</sup>Determined by <sup>1</sup>H NMR spectroscopic analysis of crude reaction mixtures. <sup>c</sup>Determined by HPLC analysis on a chiral stationary phase.

**Table S2.** Effect of Temperature<sup>a</sup>.

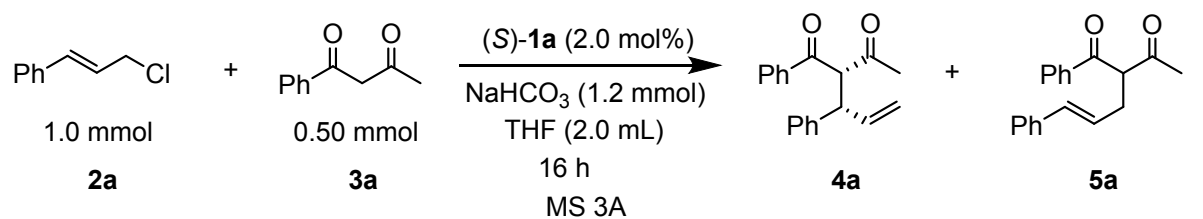

| entry          | temperature (°C) | yield <sup>b</sup> | <b>4a/5a</b> <sup>b</sup> | dr of <b>4a</b> <sup>b</sup> | ee of <b>4a</b> <sup>c</sup> |
|----------------|------------------|--------------------|---------------------------|------------------------------|------------------------------|
| 1              | 30               | 99                 | >20/1                     | 5/1                          | 93                           |
| 2              | 25               | 99                 | >20/1                     | 5/1                          | 97                           |
| 3              | 20               | 99                 | >20/1                     | 5/1                          | 93                           |
| 4              | 15               | 99                 | >20/1                     | 6/1                          | 95                           |
| 5 <sup>d</sup> | 10               | 99                 | >20/1                     | 6/1                          | 91                           |
| 6 <sup>d</sup> | 5                | 99                 | >20/1                     | 6/1                          | 92                           |
| 7 <sup>e</sup> | 0                | 99                 | >20/1                     | 7/1                          | 92                           |

<sup>a</sup>cat/NaHCO<sub>3</sub>/**2a/3a** = 0.0072/1.2/0.50/1.0 mmol in THF (2.0 mL). <sup>b</sup>Determined by <sup>1</sup>H NMR spectroscopic analysis of crude reaction mixtures. <sup>c</sup>Determined by HPLC analysis on a chiral stationary phase. <sup>d</sup>Reaction time for 2 days. <sup>e</sup>Reaction time for 3 days.

**Table S3.** Screening of Reaction Time<sup>a</sup>.

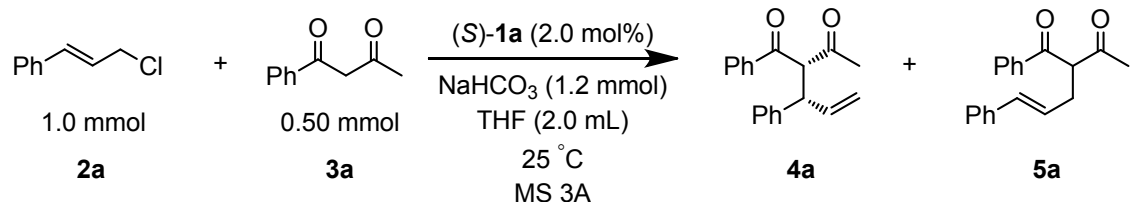

| entry | Reaction time (h) | yield(%) <sup>b</sup> | <b>4a/5a</b> <sup>b</sup> | dr of <b>4a</b> <sup>b</sup> | ee of <b>4a</b> <sup>c</sup> |
|-------|-------------------|-----------------------|---------------------------|------------------------------|------------------------------|
| 1     | 4                 | 42                    | >20/1                     | 5/1                          | –                            |
| 2     | 8                 | 94                    | >20/1                     | 5/1                          | 90                           |
| 3     | 12                | 99                    | >20/1                     | 5/1                          | 95                           |
| 4     | 24                | 99                    | >20/1                     | 5/1                          | 97                           |

<sup>a</sup>cat/NaHCO<sub>3</sub>/**2a/3a** = 0.0072/1.2/0.50/1.0 mmol in THF (2.0 mL) at 25 °C. <sup>b</sup>Determined by <sup>1</sup>H NMR spectroscopic analysis of crude reaction mixtures. <sup>c</sup>Determined by HPLC analysis on a chiral stationary phase.

**Table S4.** Stoichiometry of Substrates<sup>a</sup>.

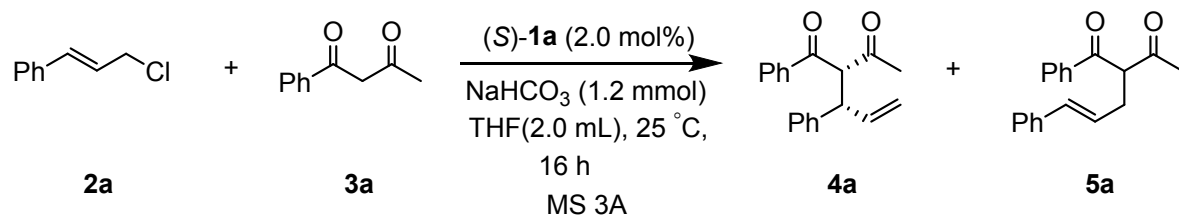

| entry | <b>2a</b> : <b>3a</b> (mmol) | yield(%) <sup>b</sup> | <b>4a/5a</b> <sup>b</sup> | dr of <b>4a</b> <sup>b</sup> | ee of <b>4a</b> <sup>c</sup> |
|-------|------------------------------|-----------------------|---------------------------|------------------------------|------------------------------|
| 1     | 1.0 : 0.50                   | 99                    | >20/1                     | 5/1                          | 97                           |
| 2     | 0.60 : 0.50                  | 90                    | >20/1                     | 5/1                          | 91                           |
| 3     | 0.50 : 1.0                   | 90                    | >20/1                     | 5/1                          | 96                           |

<sup>a</sup>cat/NaHCO<sub>3</sub> = 0.0072/1.2 mmol in THF (2.0 mL) at 25 °C. <sup>b</sup>Determined by <sup>1</sup>H NMR spectroscopic analysis of crude reaction mixtures. <sup>c</sup>Determined by HPLC analysis on a chiral stationary phase.

**1-phenyl-2-(1-phenylallyl)butane-1,3-dione (4a)**

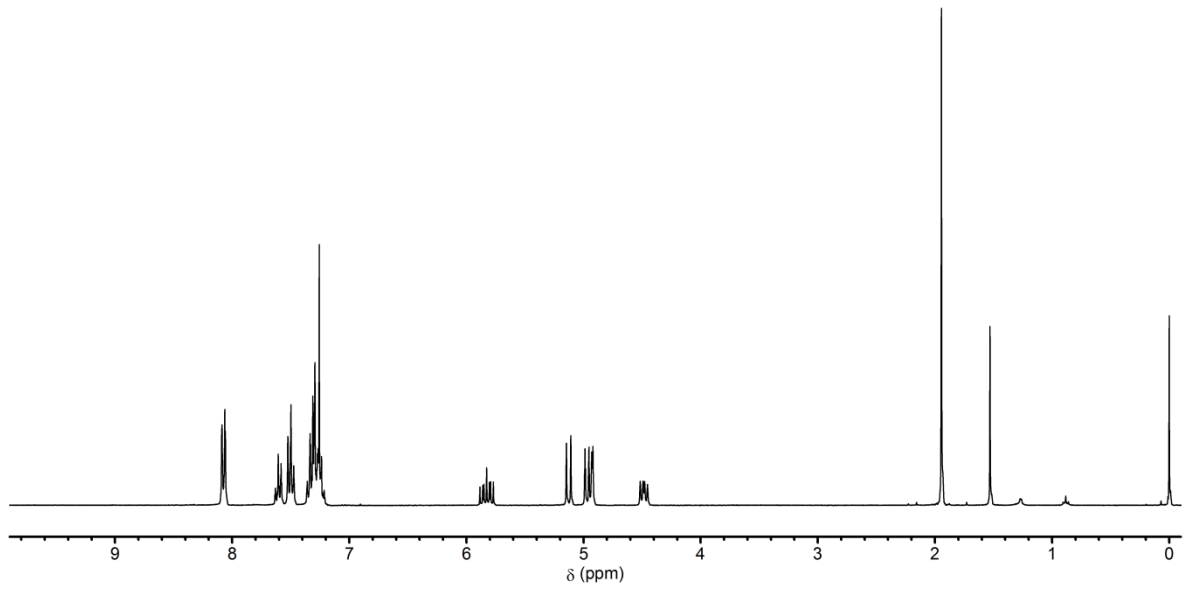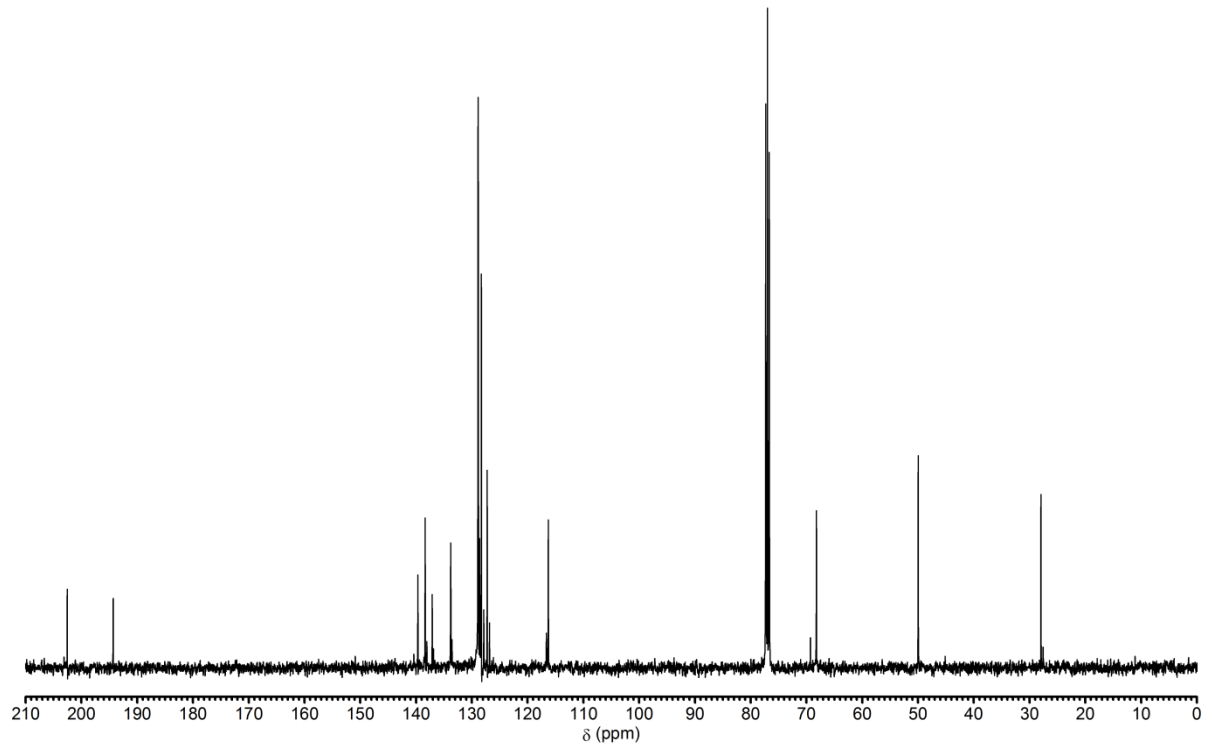

**1-phenyl-2-(1-(4-methoxyphenyl)allyl)butane-1,3-dione (4b)**

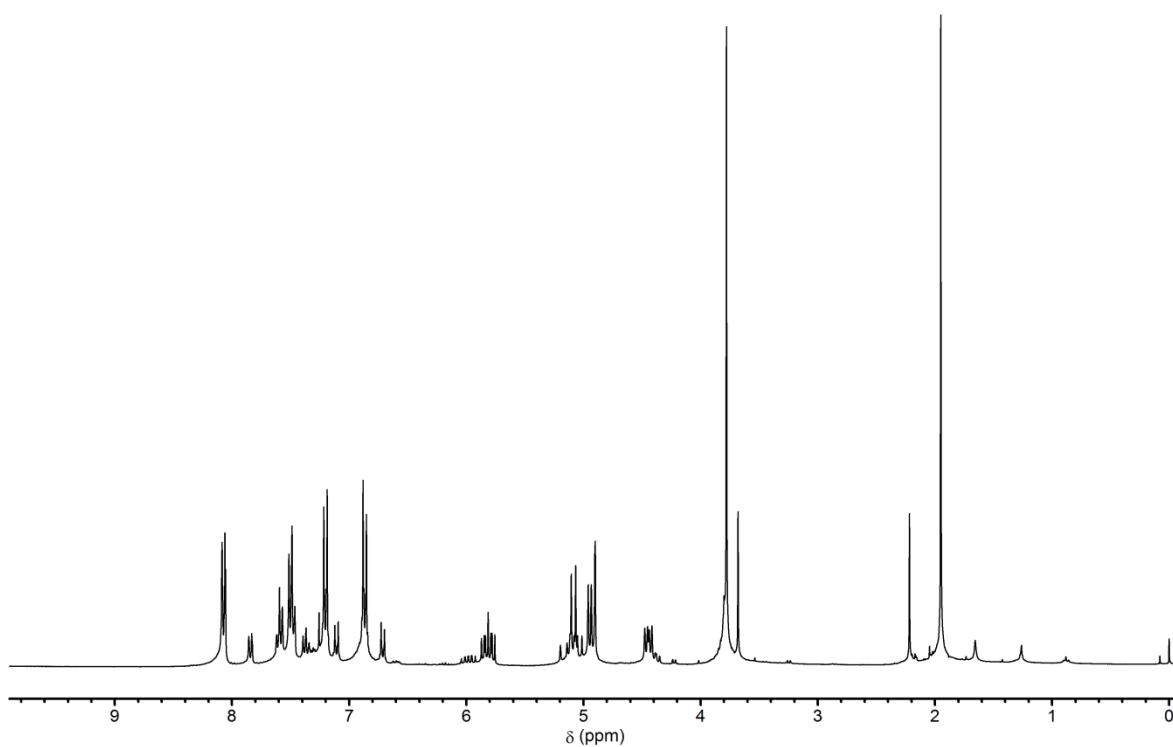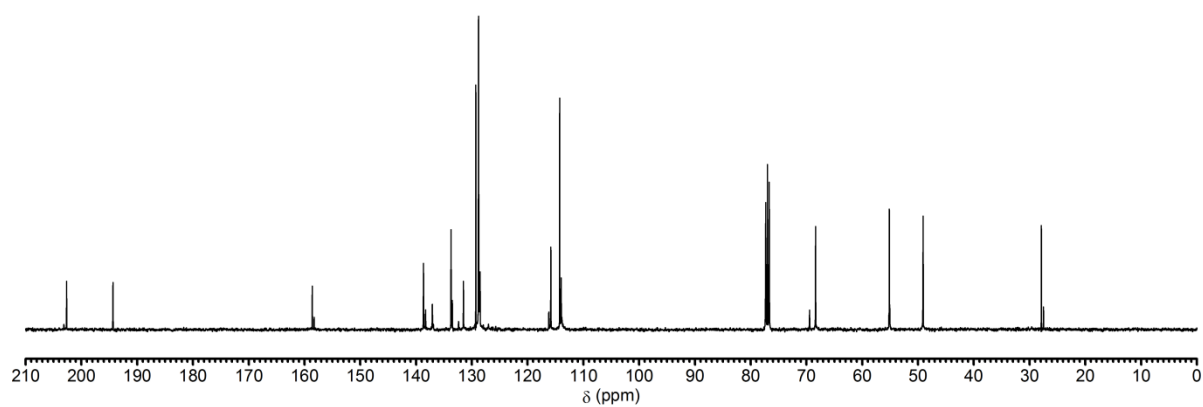

**1-phenyl-2-(1-(4-acetylphenyl)allyl)butane-1,3-dione (4c)**

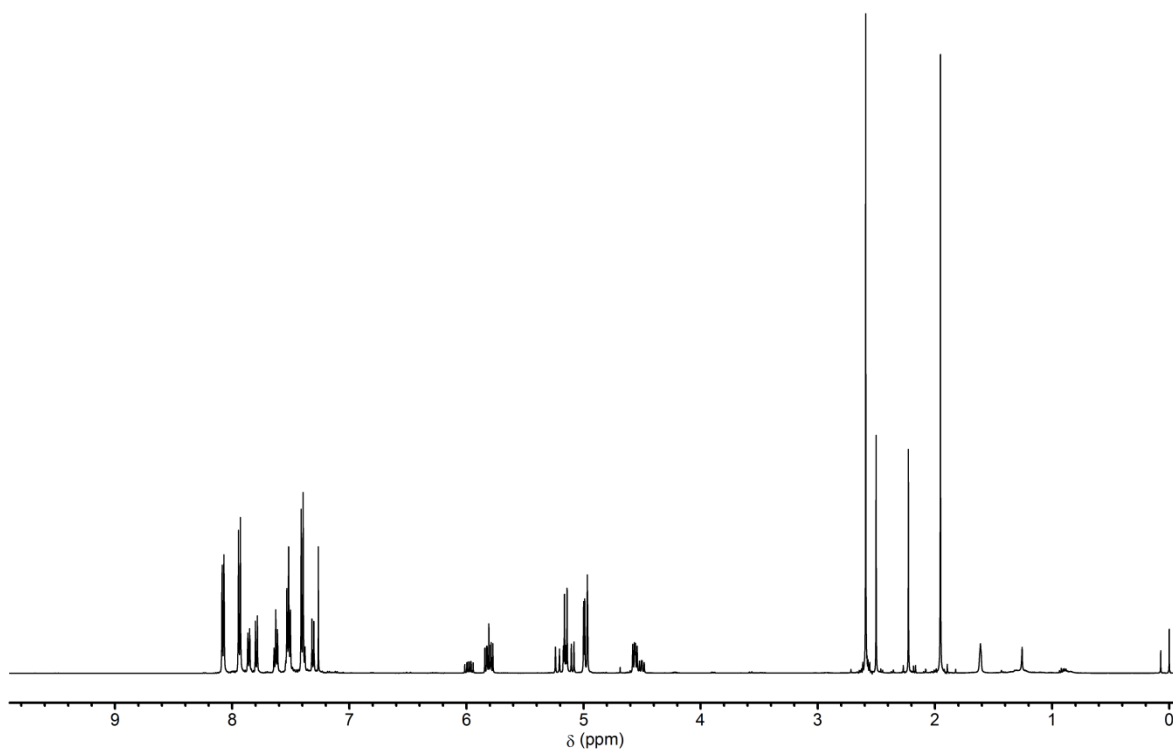

**1-phenyl-2-(1-(4-(trifluoromethyl)phenyl)allyl)butane-1,3-dione (4d)**

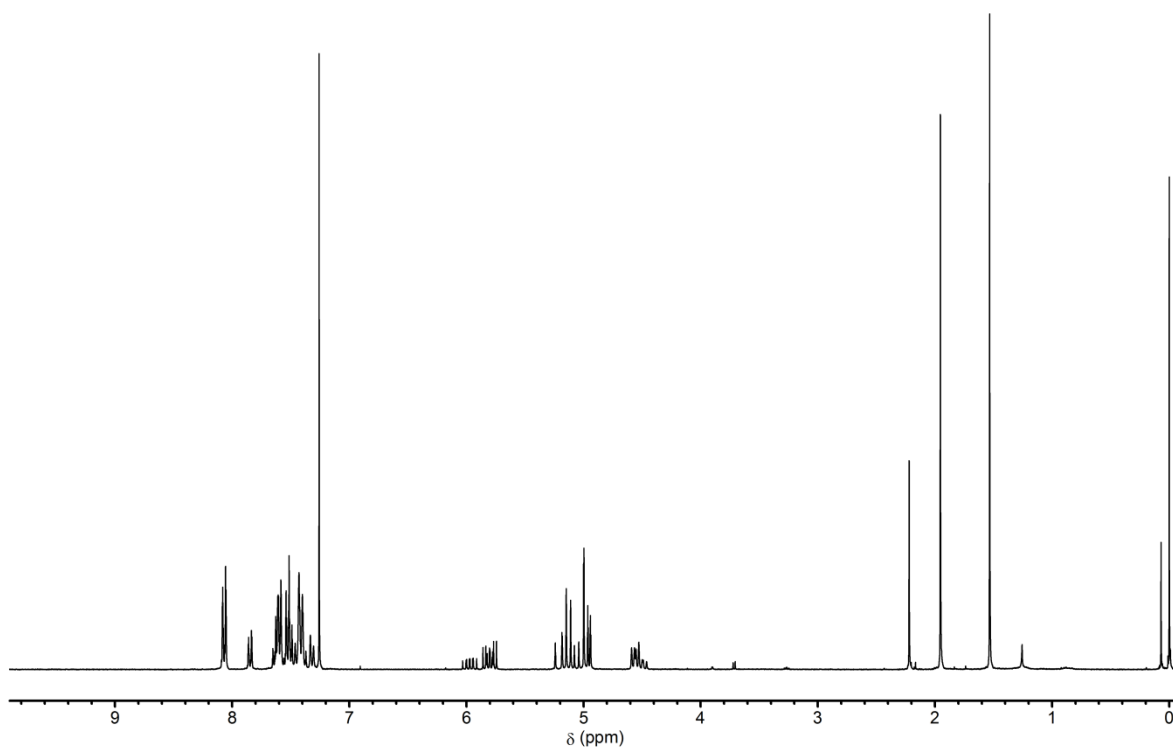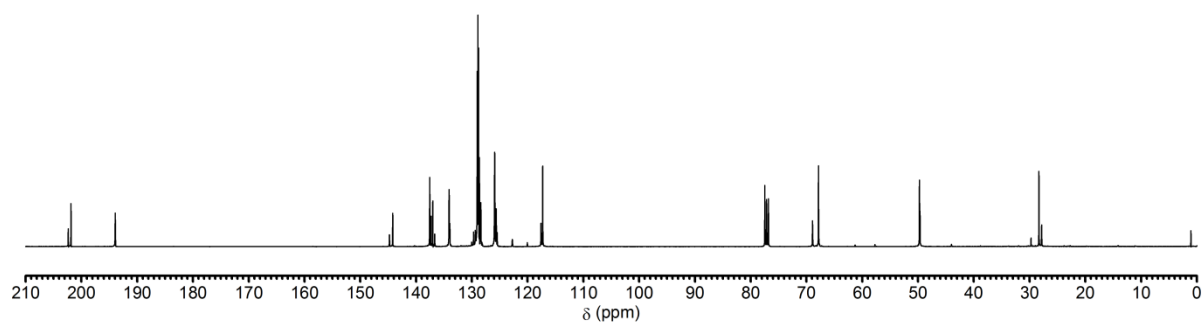

**1-(4-methoxyphenyl)-2-(1-phenylallyl)butane-1,3-dione (4e)**



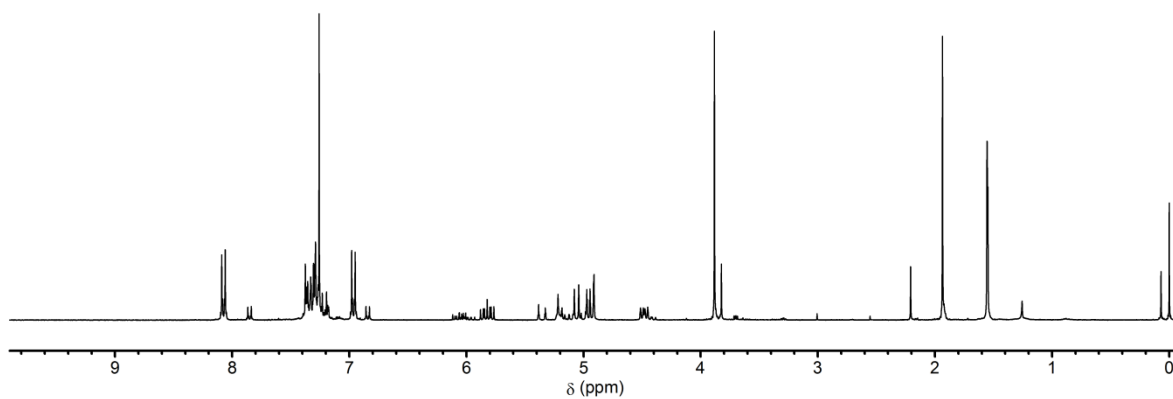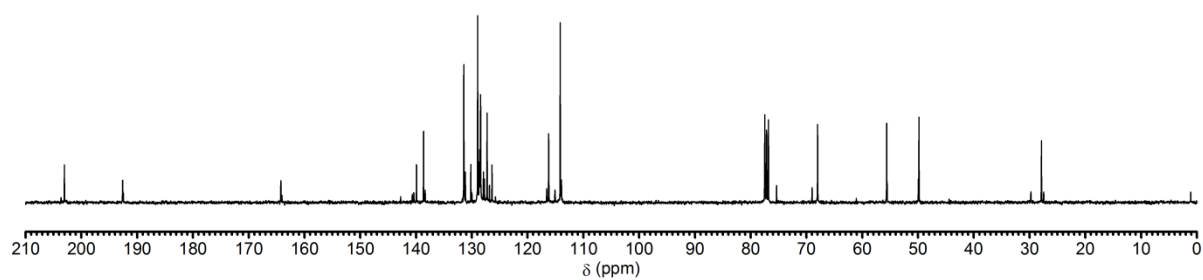

**1-(4-fluorophenyl)-2-(1-phenylallyl)butane-1,3-dione (4f)**

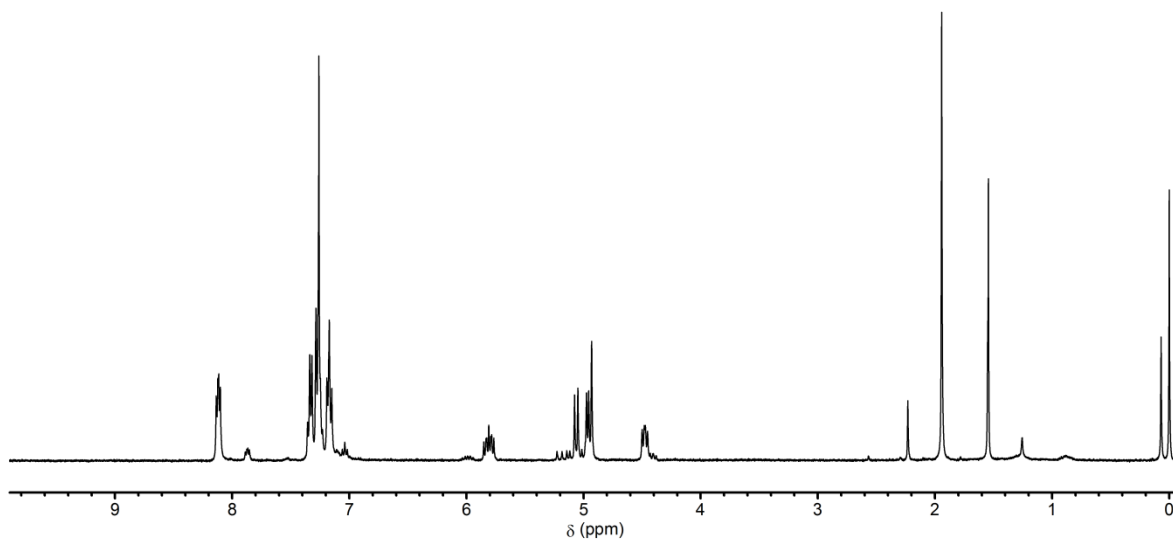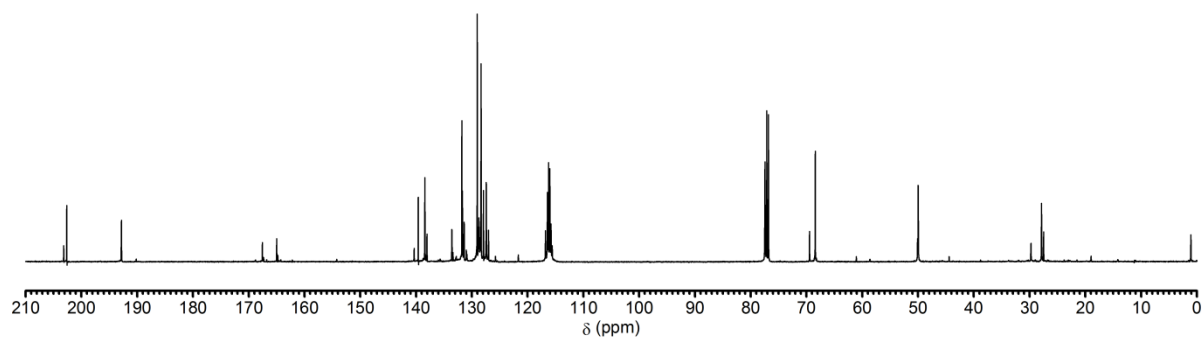

**1-(naphthalen-2-yl)-2-(1-phenylallyl)butane-1,3-dione (4g)**

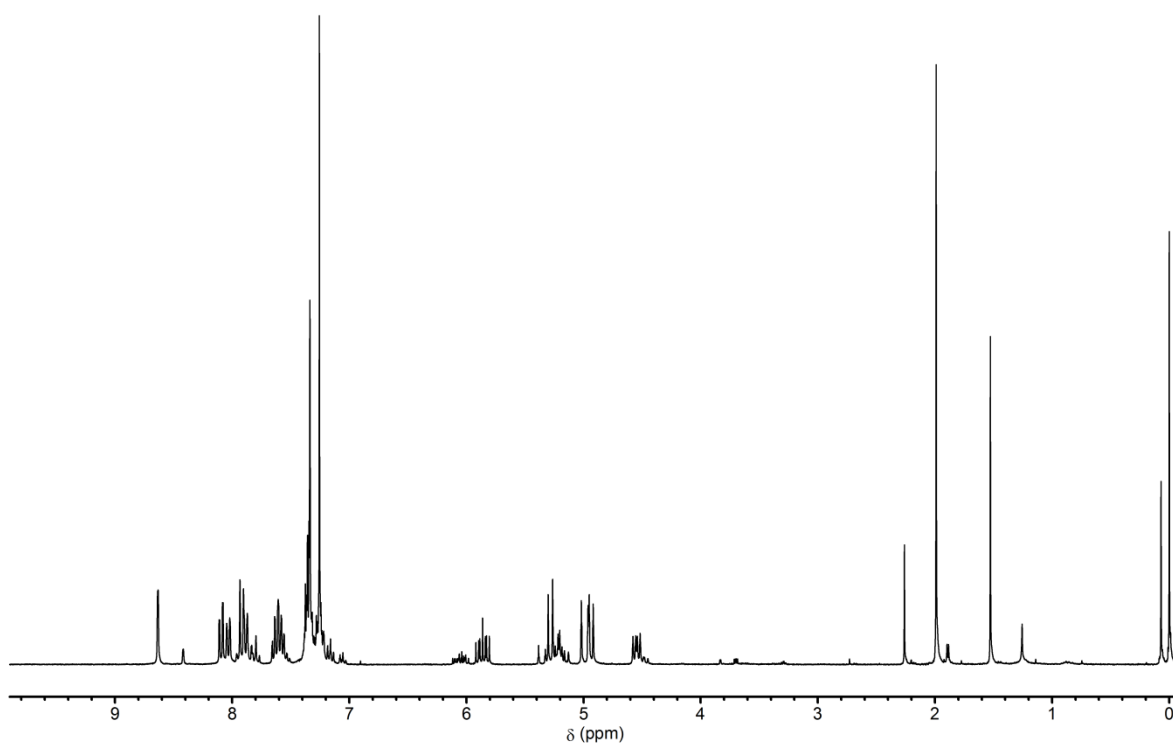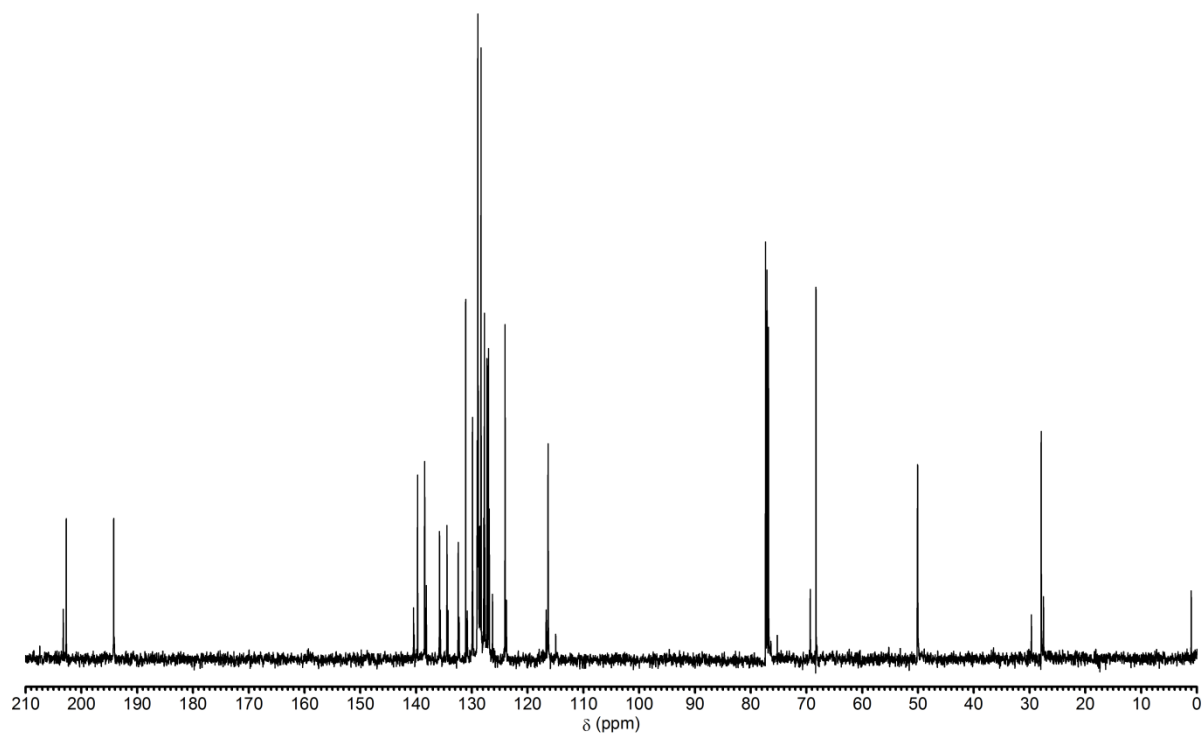

**1-(naphthalen-1-yl)-2-(1-phenylallyl)butane-1,3-dione (4h)**

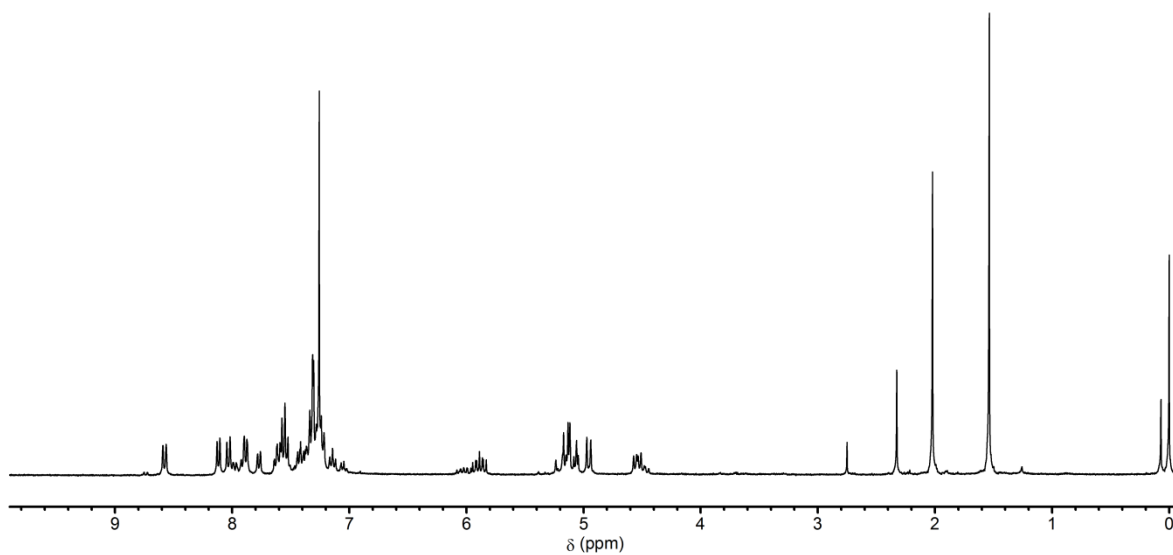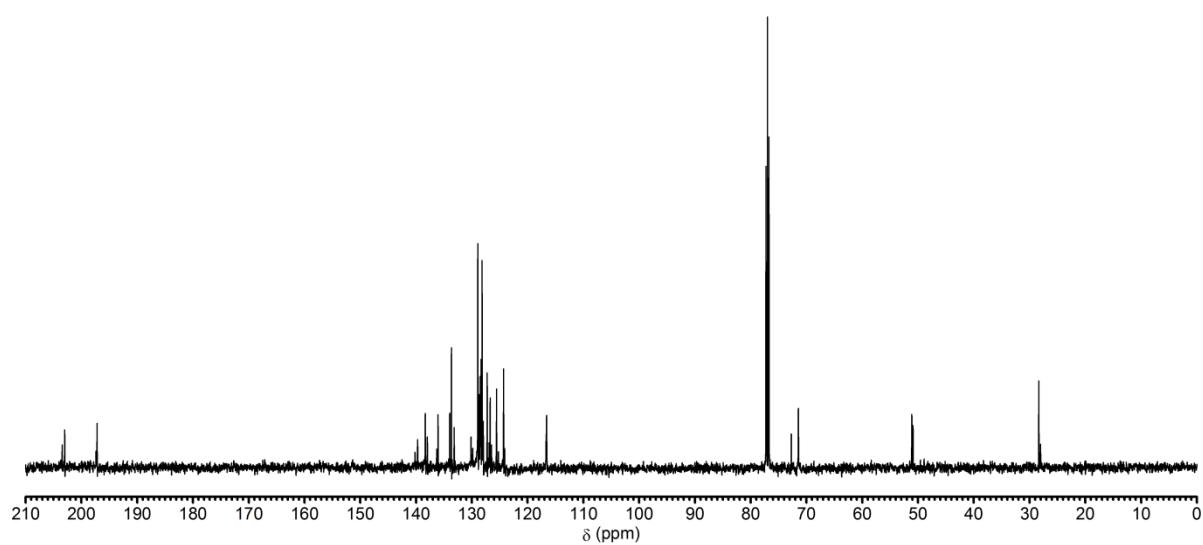

**4,4-dimethyl-1-phenyl-2-(1-phenylallyl)pentane-1,3-dione (4i)**

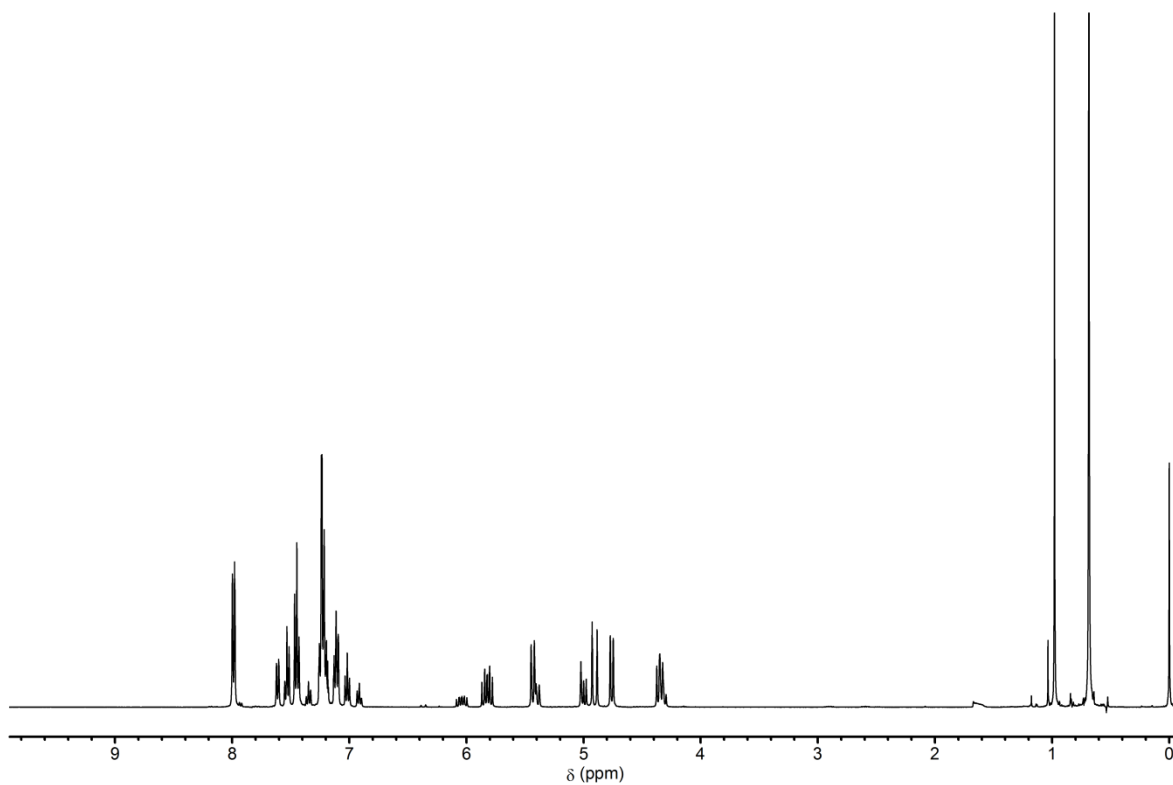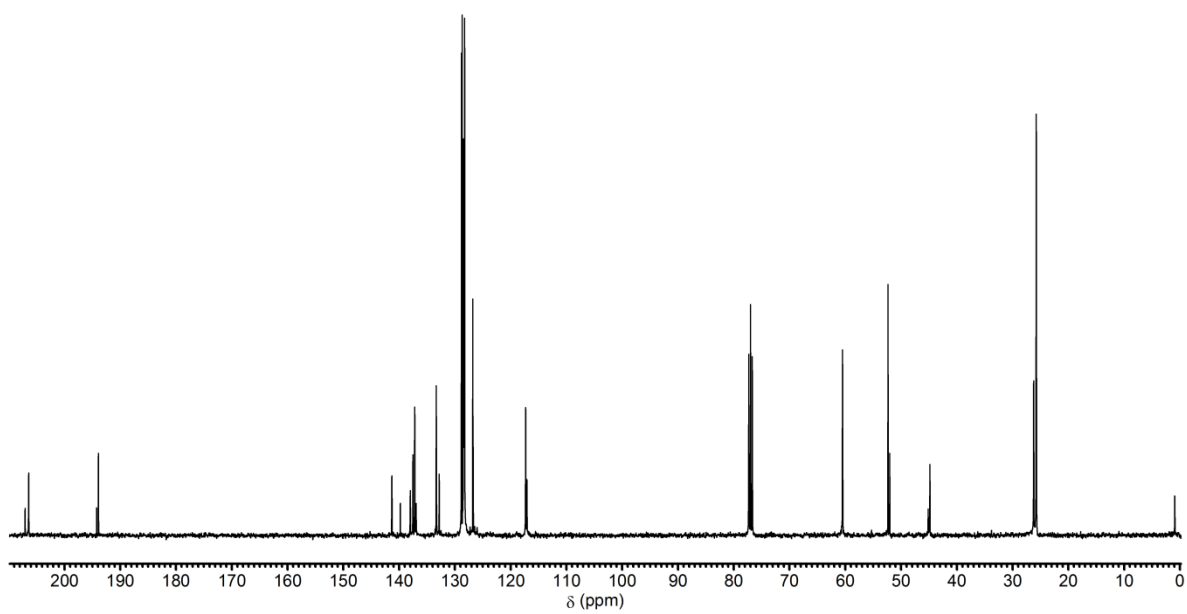

**4-methyl-1-phenyl-2-(1-phenylallyl)pentane-1,3-dione (4j)**

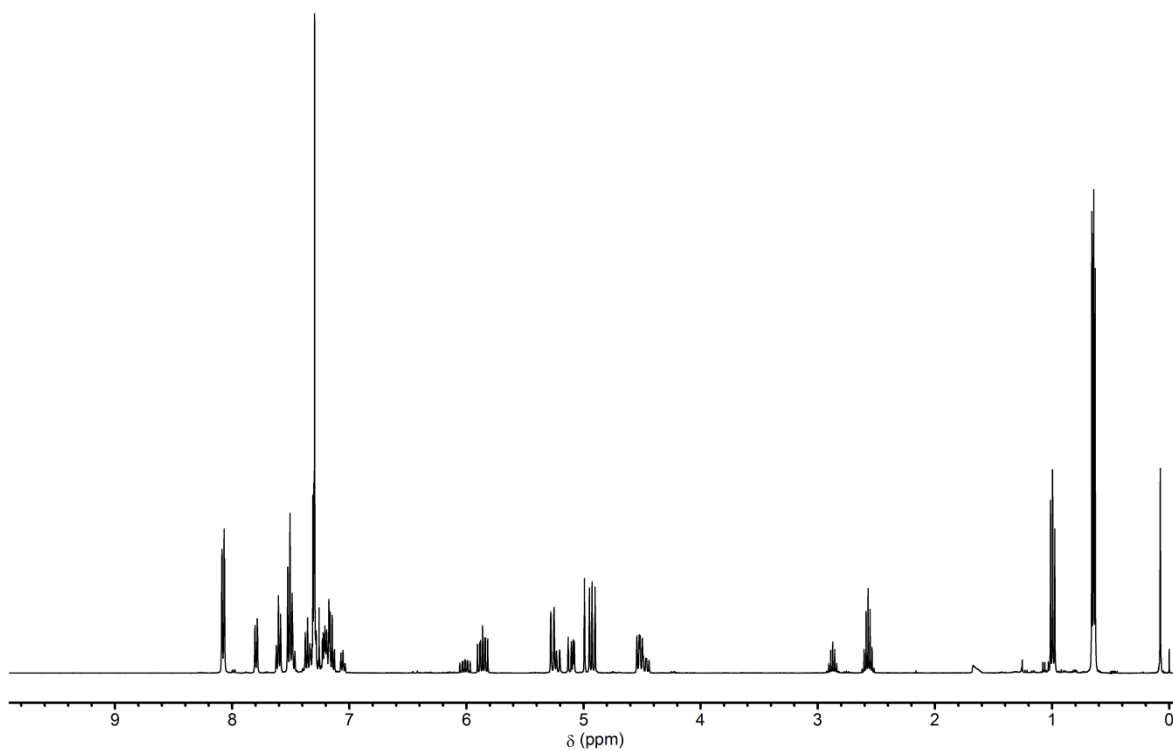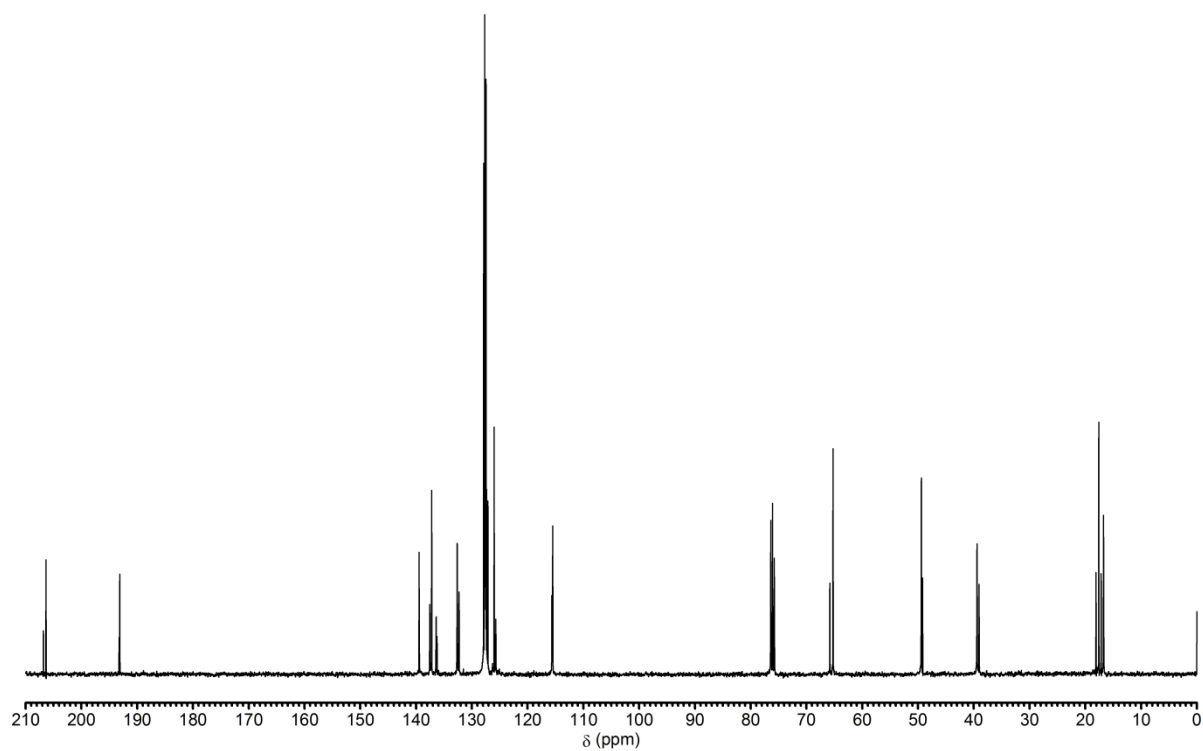

**1-phenyl-2-(1-phenylallyl)pentane-1,3-dione (4k)**

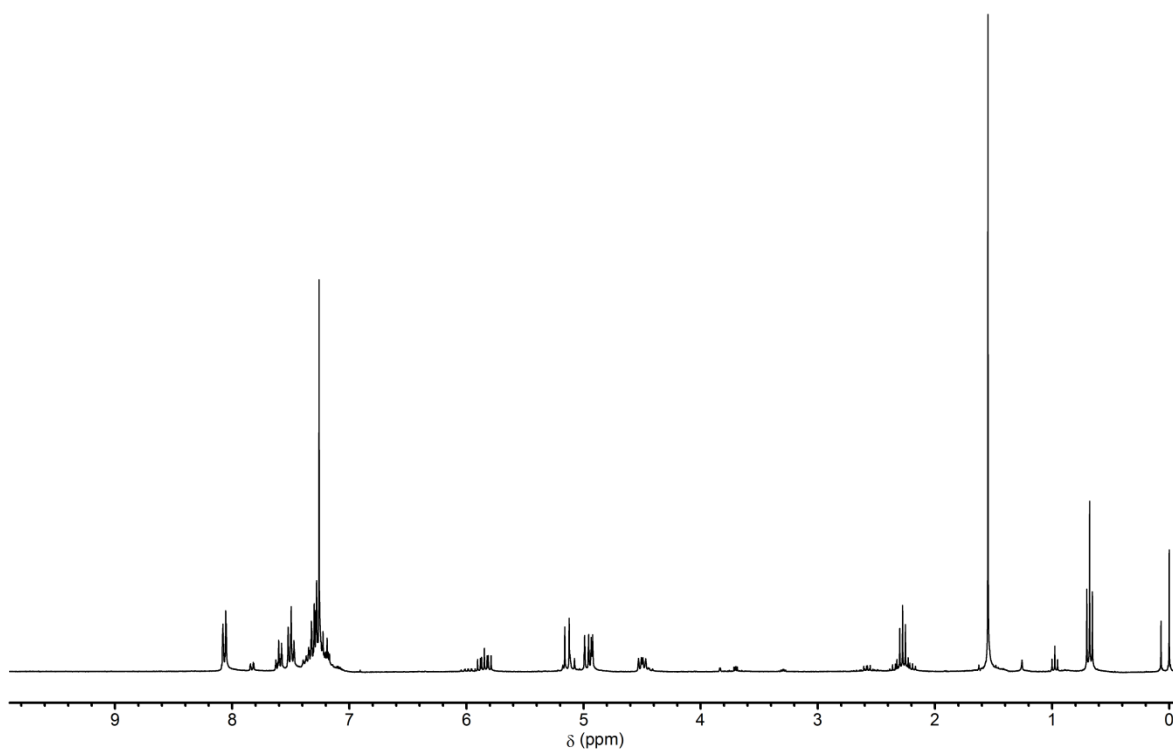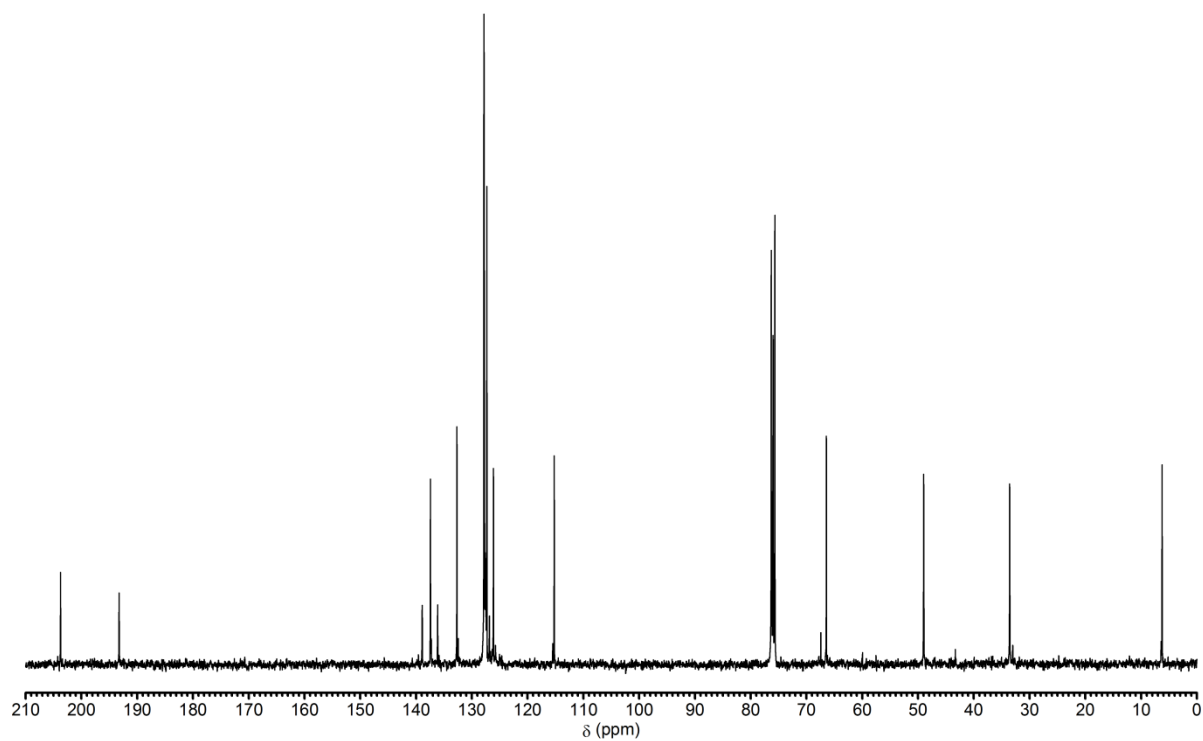

**1-phenyl-2-(1-phenylallyl)heptane-1,3-dione (4l)**

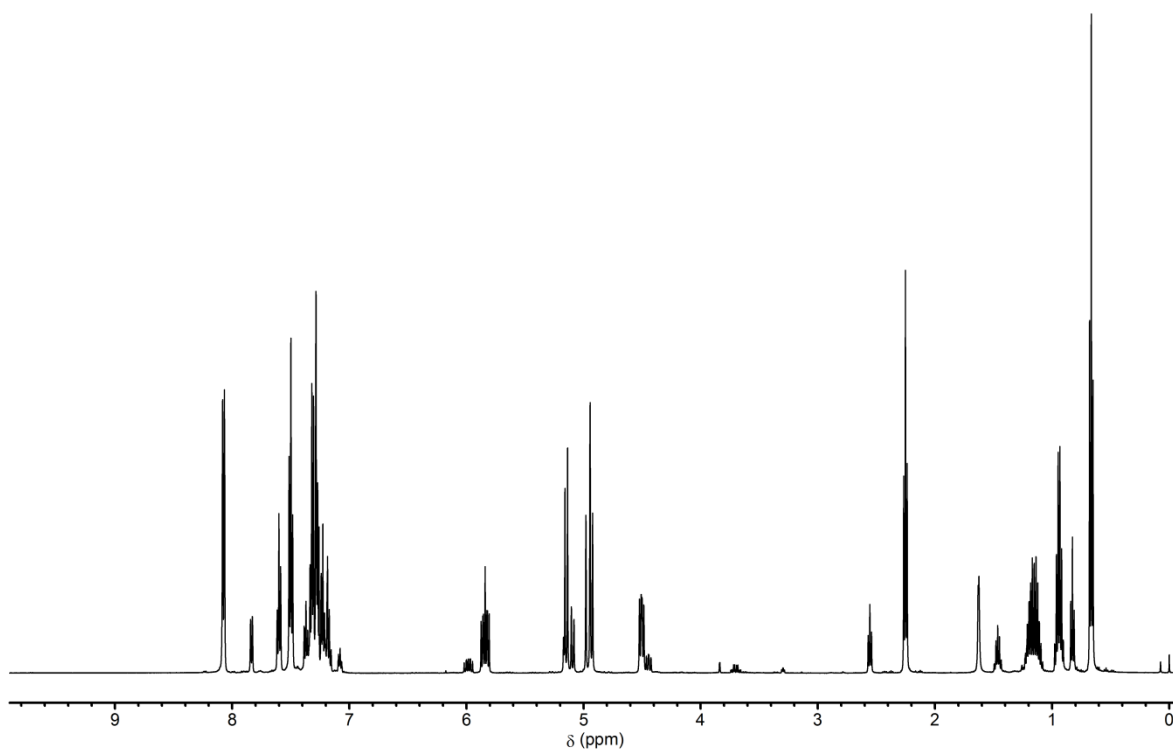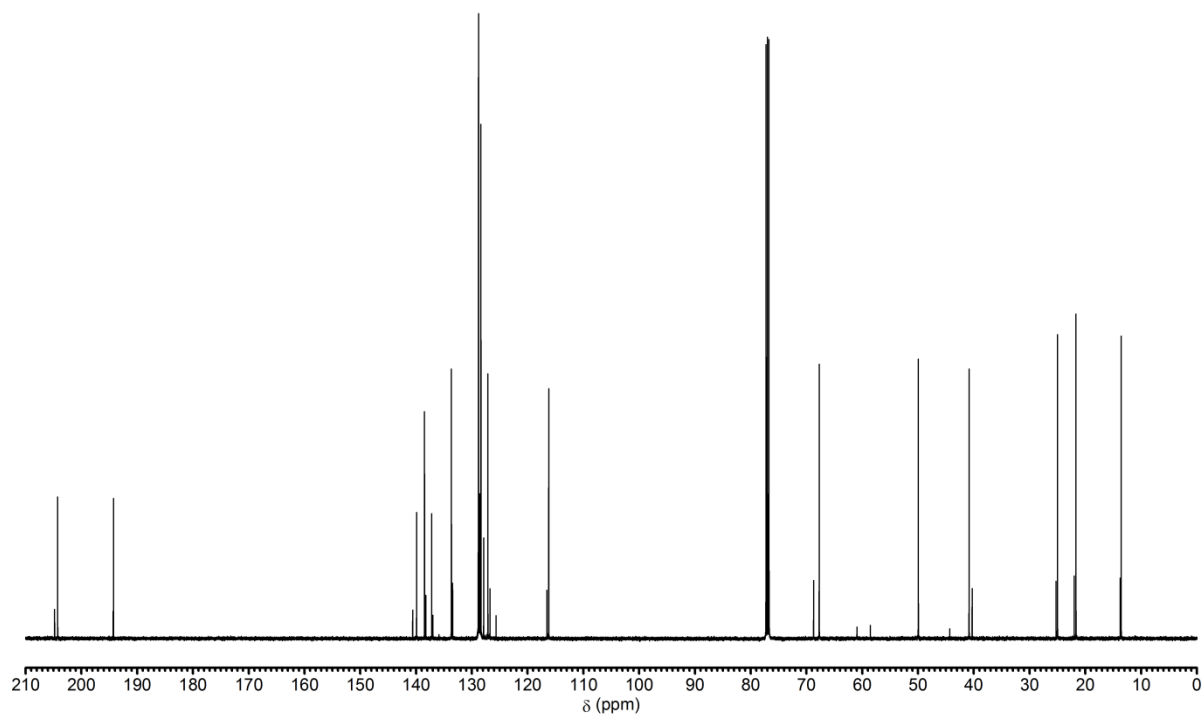

**5,5-dimethyl-3-(1-phenylallyl)hexane-2,4-dione (4m)**



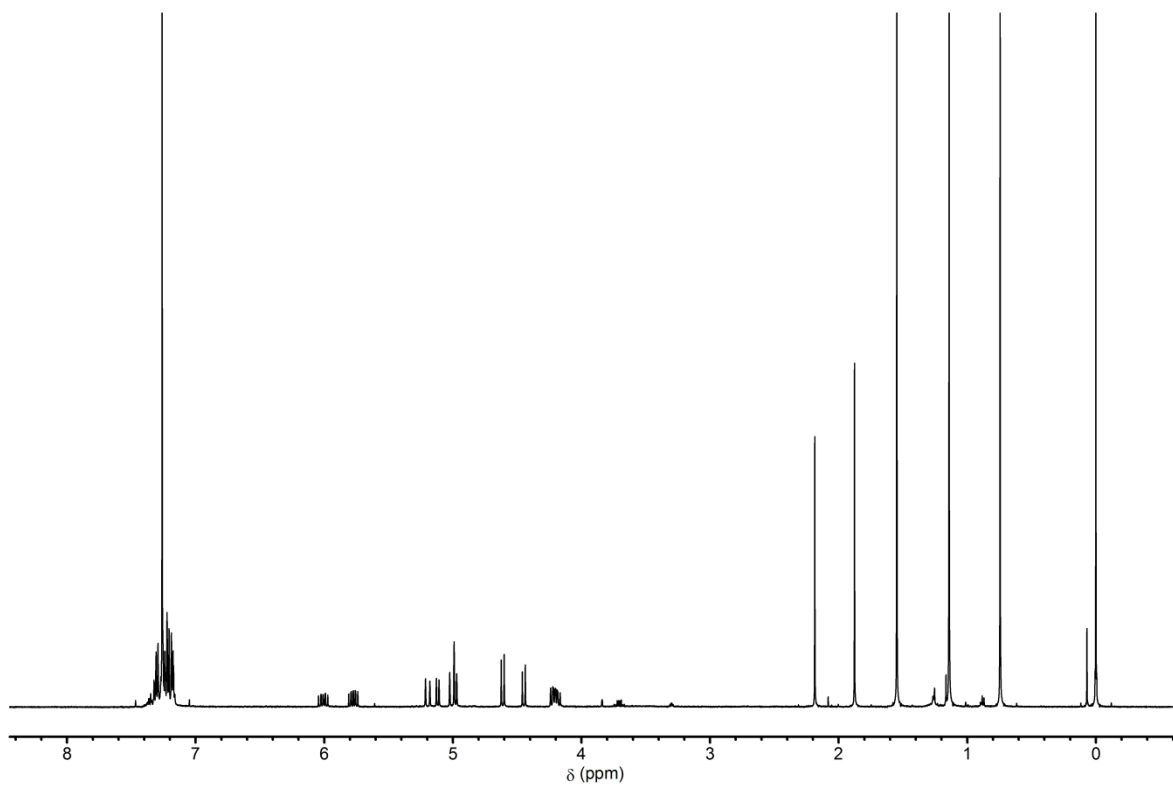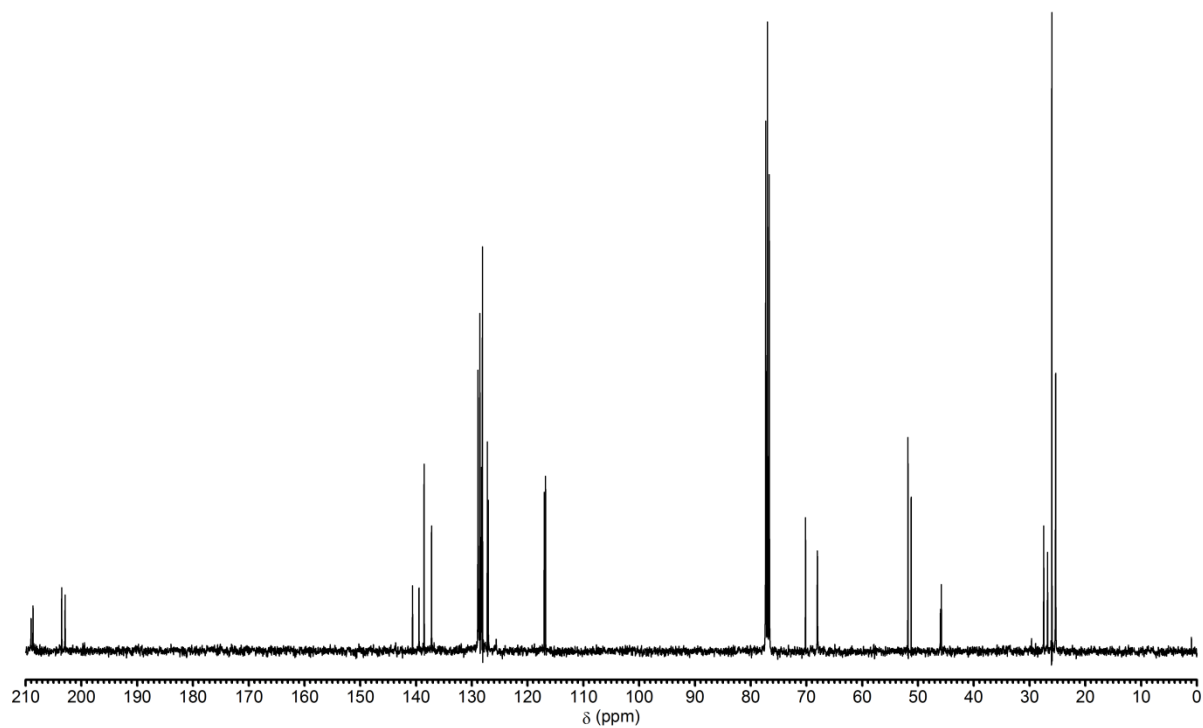

**(1-hydroxyethyl)-1,3-diphenylpent-4-en-1-one (5a)**

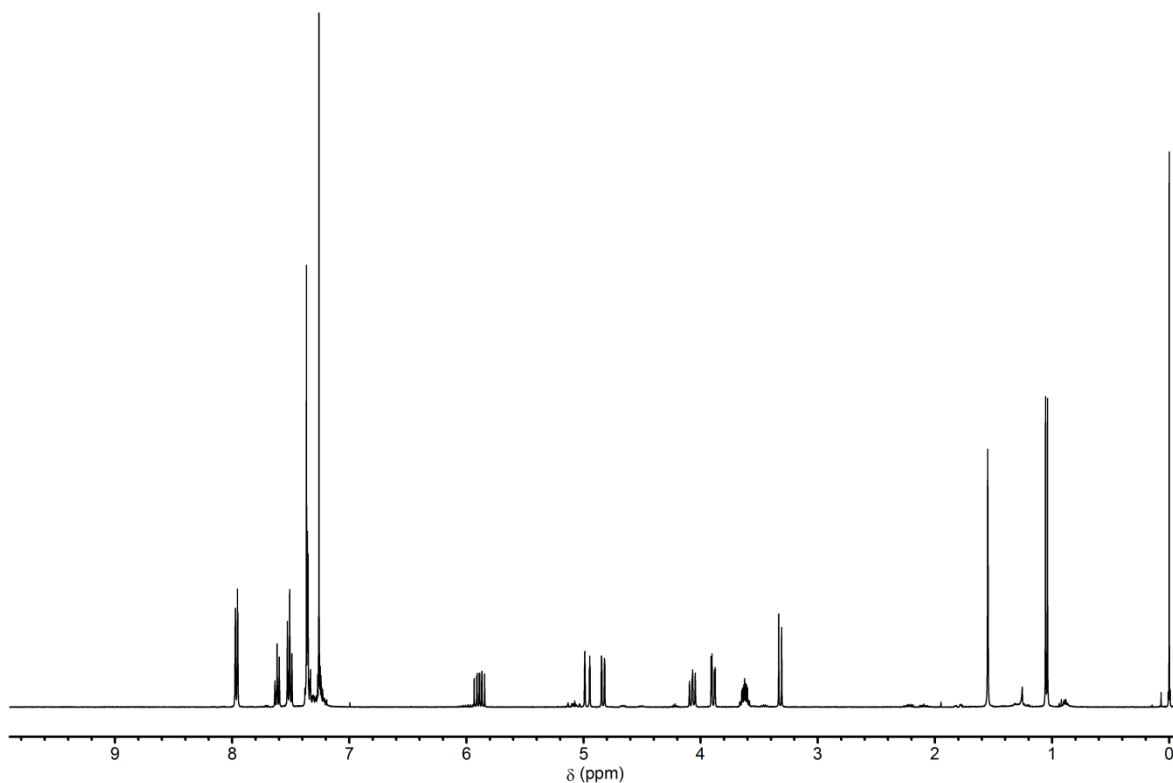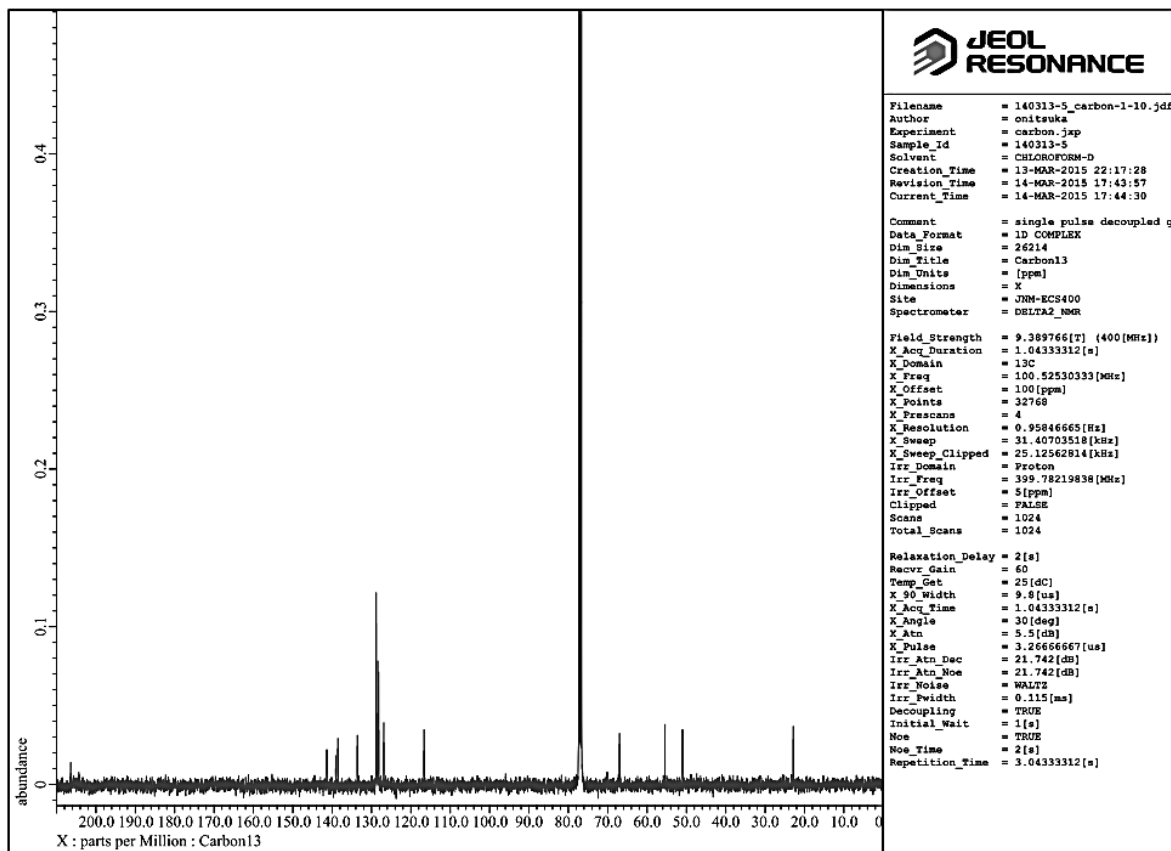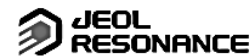

Filename = 140313-5\_carbon-1-10.jdf  
 Author = onitauka  
 Experiment = carbon.jxp  
 Sample\_Id = 140313-5  
 Solvent = CHLOROFORM-D  
 Creation\_Time = 13-MAR-2015 22:17:28  
 Revision\_Time = 14-MAR-2015 17:43:57  
 Current\_Time = 14-MAR-2015 17:44:30  
  
 Comment = single pulse decoupled g  
 Data\_Format = 1D COMPLEX  
 Dim\_Size = 26214  
 Dim\_Title = Carbon13  
 Dim\_Units = [ppm]  
 Dimensions = X  
 Site = JRM-ECS400  
 Spectrometer = DELTA2\_MMR  
  
 Field\_Strength = 9.389766[T] (400[MHz])  
 X\_Acq\_Duration = 1.04333312[s]  
 X\_Domain = 13C  
 X\_Freq = 100.62530333[MHz]  
 X\_Offset = 100[ppm]  
 X\_Points = 32768  
 X\_Prescans = 4  
 X\_Resolution = 0.95846665[Hz]  
 X\_Sweep = 31.40703518[kHz]  
 X\_Sweep\_Clipped = 25.12562814[kHz]  
 Irr\_Domain = Proton  
 Irr\_Freq = 399.78219838[MHz]  
 Irr\_Offset = 5[ppm]  
 Clipped = FALSE  
 Scans = 1024  
 Total\_Scans = 1024  
  
 Relaxation\_Delay = 2[s]  
 Recvr\_Gain = 60  
 Temp\_Gct = 25[dC]  
 X\_90\_Width = 9.8[us]  
 X\_Acq\_Time = 1.04333312[s]  
 X\_Angle = 30[deg]  
 X\_Atn = 5.5[db]  
 X\_Pulse = 3.26666667[us]  
 Irr\_Atn\_Dec = 21.742[db]  
 Irr\_Atn\_NoE = 21.742[db]  
 Irr\_Noise = WALTZ  
 Irr\_Width = 0.115[ms]  
 Decoupling = TRUE  
 Initial\_Wait = 1[s]  
 Noe = TRUE  
 Noe\_Time = 2[s]  
 Repetition\_Time = 3.04333312[s]

**1-phenyl-2-(1-phenylallyl)butane-1,3-diol (6a)**

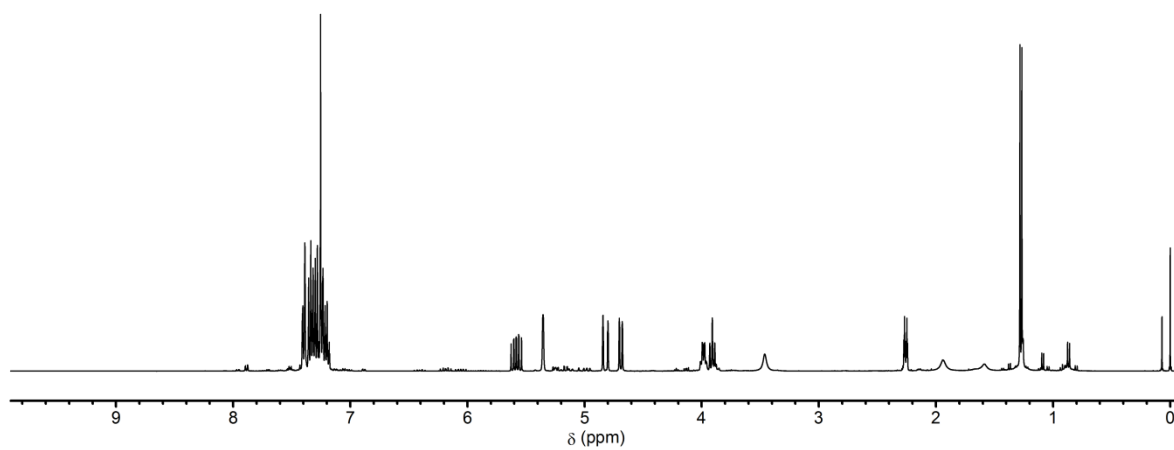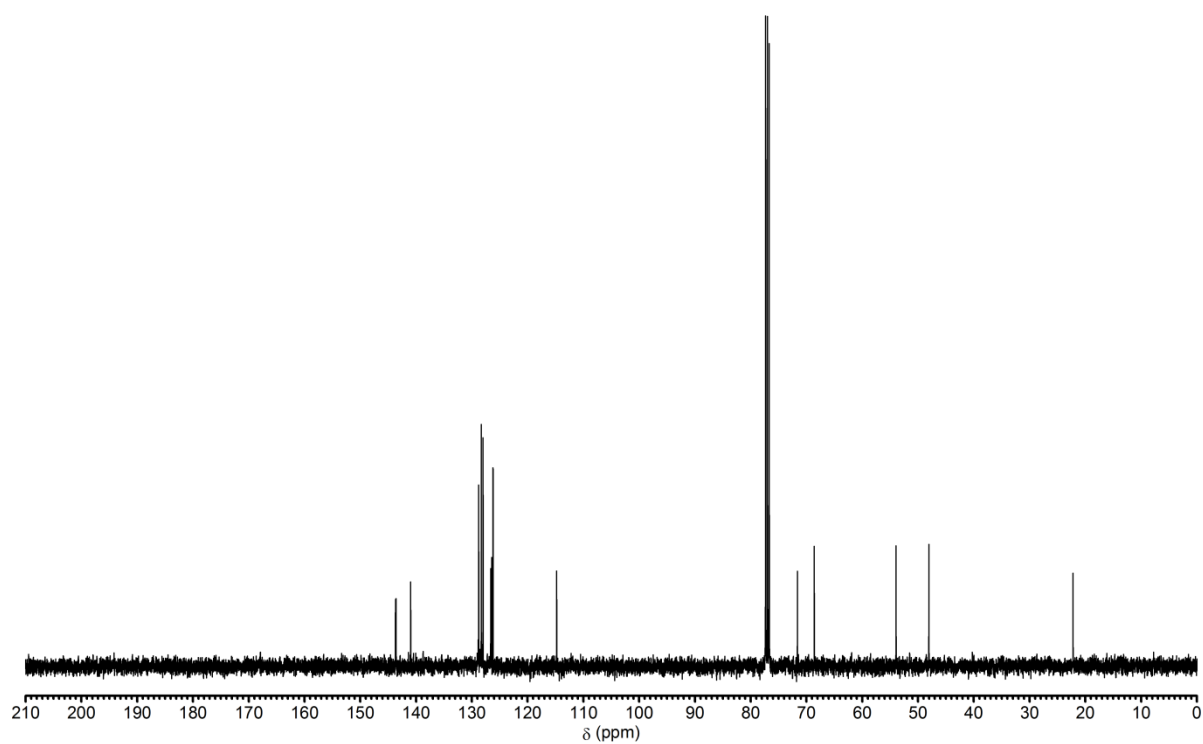

**(4*S*,5*S*,6*R*)-2,2,4-trimethyl-6-phenyl-5-((*S*)-1-phenylallyl)-1,3-dioxane (7a)**

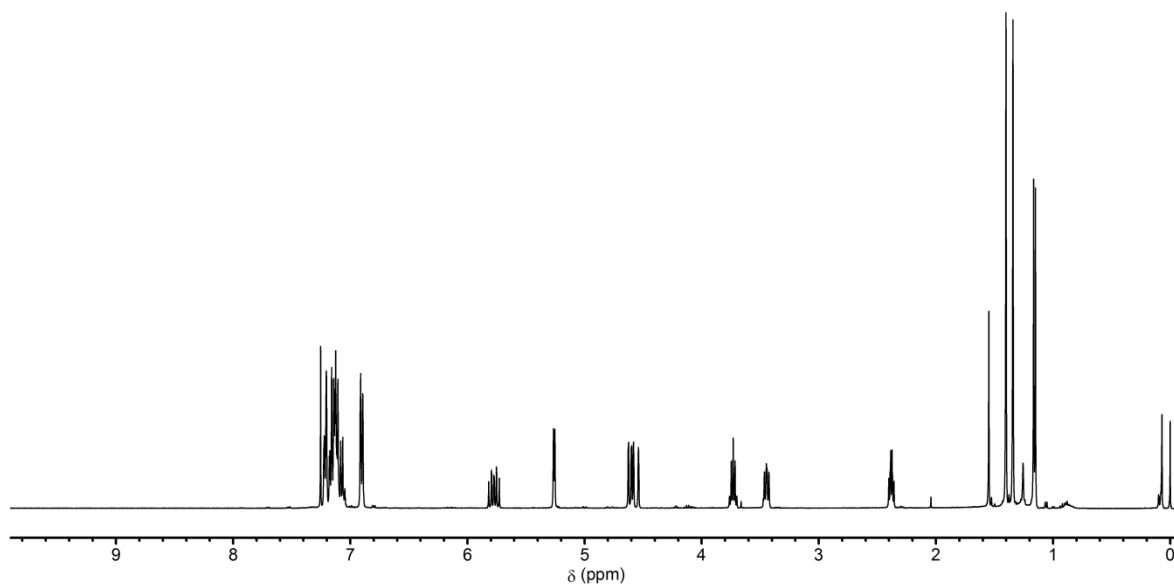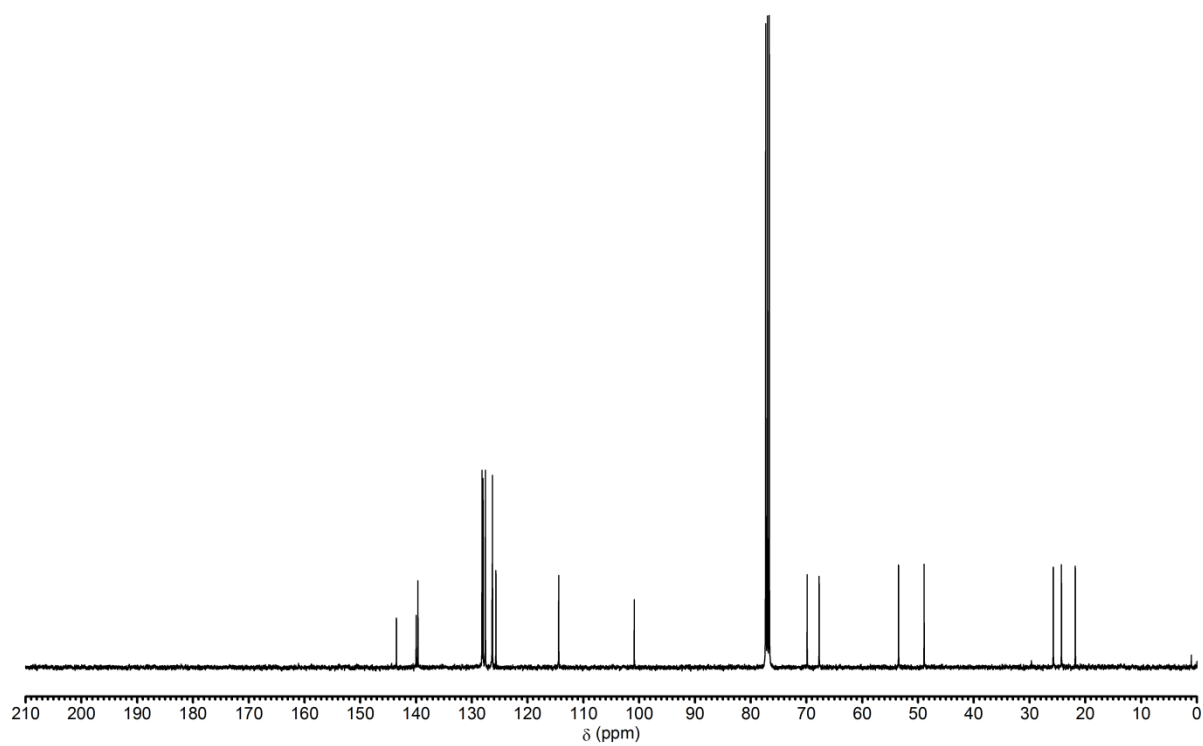

**1-phenyl-2-(1-phenylallyl)butane-1,3-dione (4a)**

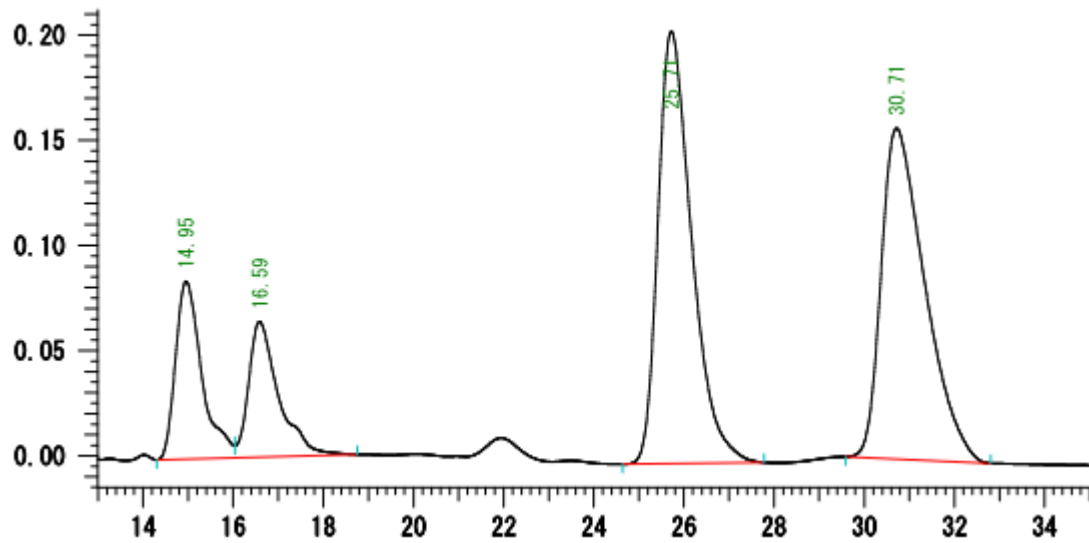

| NO | RT    | 面積       | 濃度1     | BC |
|----|-------|----------|---------|----|
| 1  | 14.95 | 1710744  | 12.340  | BV |
| 2  | 16.59 | 1479855  | 10.675  | VB |
| 3  | 25.71 | 5368841  | 38.727  | BB |
| 4  | 30.71 | 5303731  | 38.258  | BB |
|    |       | 13863171 | 100.000 |    |

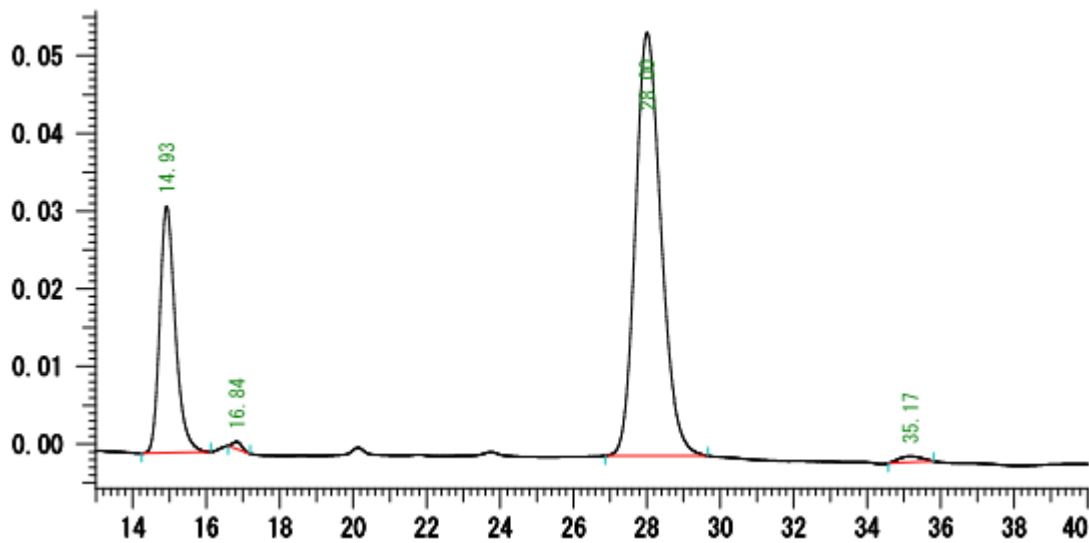

| NO | RT    | 面積      | 濃度1     | BC |
|----|-------|---------|---------|----|
| 1  | 14.93 | 464083  | 25.674  | BB |
| 2  | 16.84 | 7688    | 0.425   | BB |
| 3  | 28.00 | 1319037 | 72.972  | BB |
| 4  | 35.17 | 16794   | 0.929   | BB |
|    |       | 1807602 | 100.000 |    |

1-phenyl-2-(1-(4-acetylphenyl)allyl)butane-1,3-dione (4c)

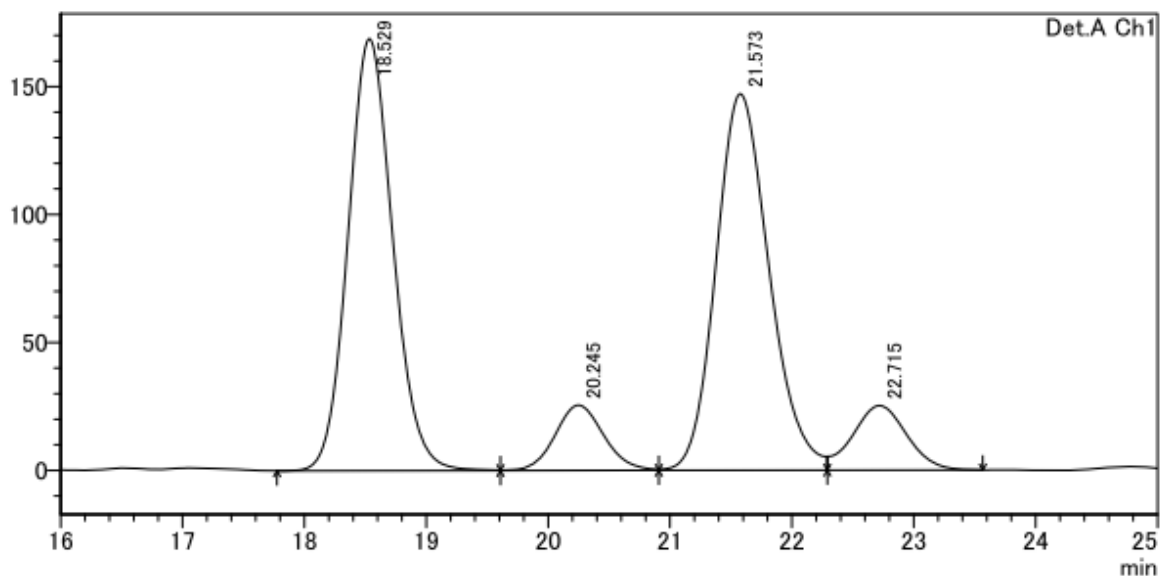

Peak Table

UV-Vis Ch1 254nm

| Peak | Retention Time | Area     | High   | Area Percent |
|------|----------------|----------|--------|--------------|
| 1    | 18.529         | 4310296  | 168793 | 42.074       |
| 2    | 20.245         | 704183   | 25507  | 6.874        |
| 3    | 21.573         | 4462192  | 147072 | 43.556       |
| 4    | 22.715         | 767975   | 25193  | 7.496        |
| 合計   |                | 10244647 | 366564 | 100.000      |

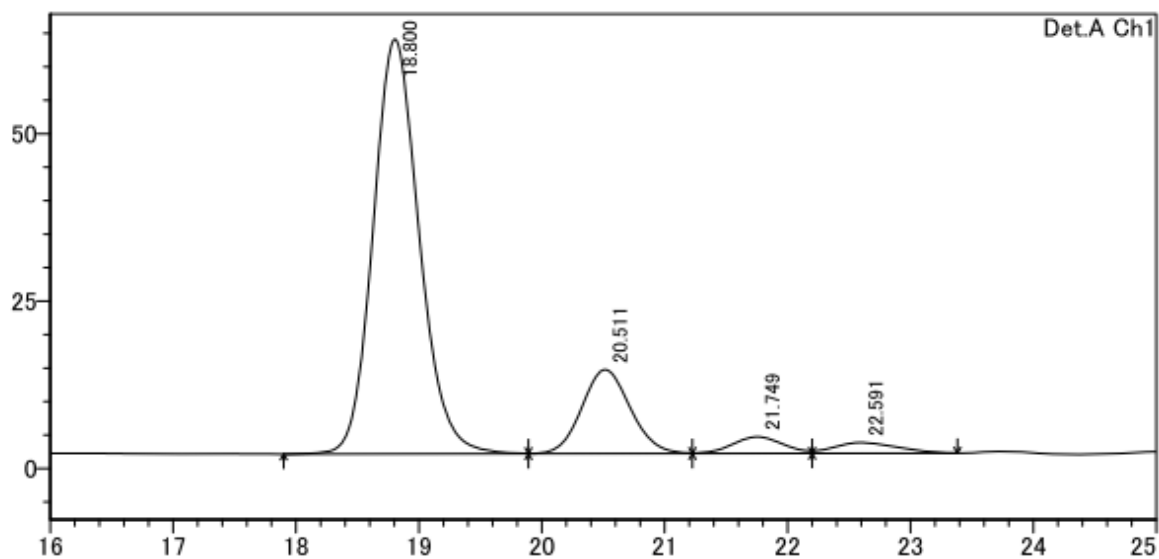

| Peak | Retention Time | Area    | High  | Area Percent |
|------|----------------|---------|-------|--------------|
| 1    | 18.800         | 1615766 | 61932 | 77.462       |
| 2    | 20.511         | 343559  | 12545 | 16.471       |
| 3    | 21.749         | 70188   | 2478  | 3.365        |
| 4    | 22.591         | 56360   | 1593  | 2.702        |
| 合計   |                | 2085873 | 78548 | 100.000      |

1-phenyl-2-(1-(4-(trifluoromethyl)phenyl)allyl)butane-1,3-dione (4d)

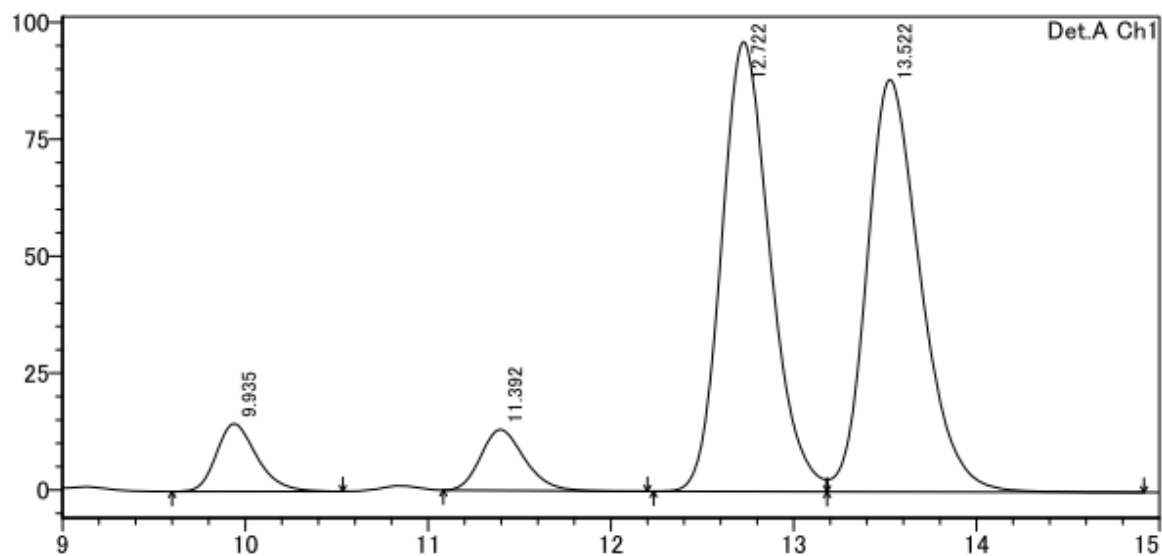

| Peak | Retention Time | Area    | High   | Area Percent |
|------|----------------|---------|--------|--------------|
| 1    | 9.935          | 222907  | 14466  | 5.557        |
| 2    | 11.392         | 216807  | 12999  | 5.405        |
| 3    | 12.722         | 1775144 | 96151  | 44.256       |
| 4    | 13.522         | 1796266 | 88136  | 44.782       |
| 合計   |                | 4011124 | 211752 | 100.000      |

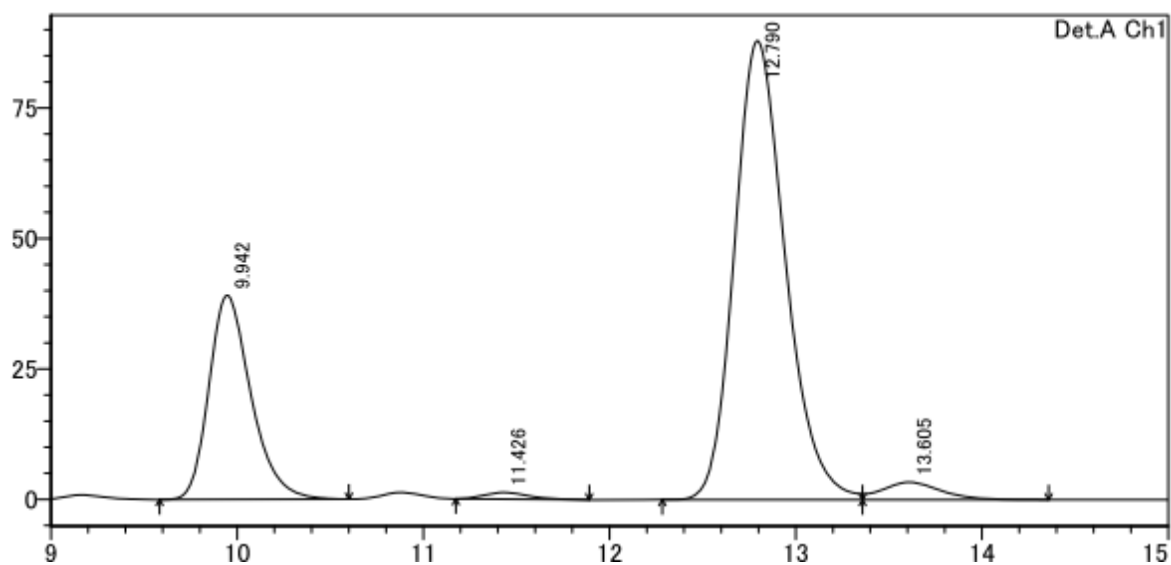

| Peak | Retention Time | Area    | High   | Area Percent |
|------|----------------|---------|--------|--------------|
| 1    | 9.942          | 613860  | 39103  | 25.799       |
| 2    | 11.426         | 20374   | 1270   | 0.856        |
| 3    | 12.790         | 1672628 | 87936  | 70.296       |
| 4    | 13.605         | 72556   | 3355   | 3.049        |
| 合計   |                | 2379418 | 131665 | 100.000      |

1-(4-methoxyphenyl)-2-(1-phenylallyl)butane-1,3-dione (4e)

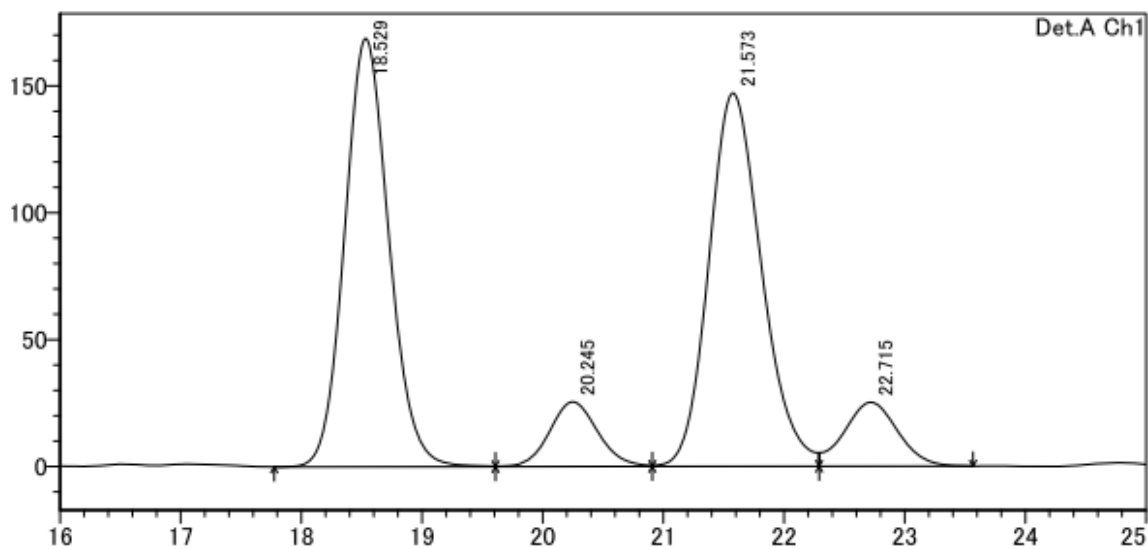

| Peak | Retention Time | Area     | High   | Area Percent |
|------|----------------|----------|--------|--------------|
| 1    | 18.529         | 4310296  | 168793 | 42.074       |
| 2    | 20.245         | 704183   | 25507  | 6.874        |
| 3    | 21.573         | 4462192  | 147072 | 43.556       |
| 4    | 22.715         | 767975   | 25193  | 7.496        |
| 合計   |                | 10244647 | 366564 | 100.000      |

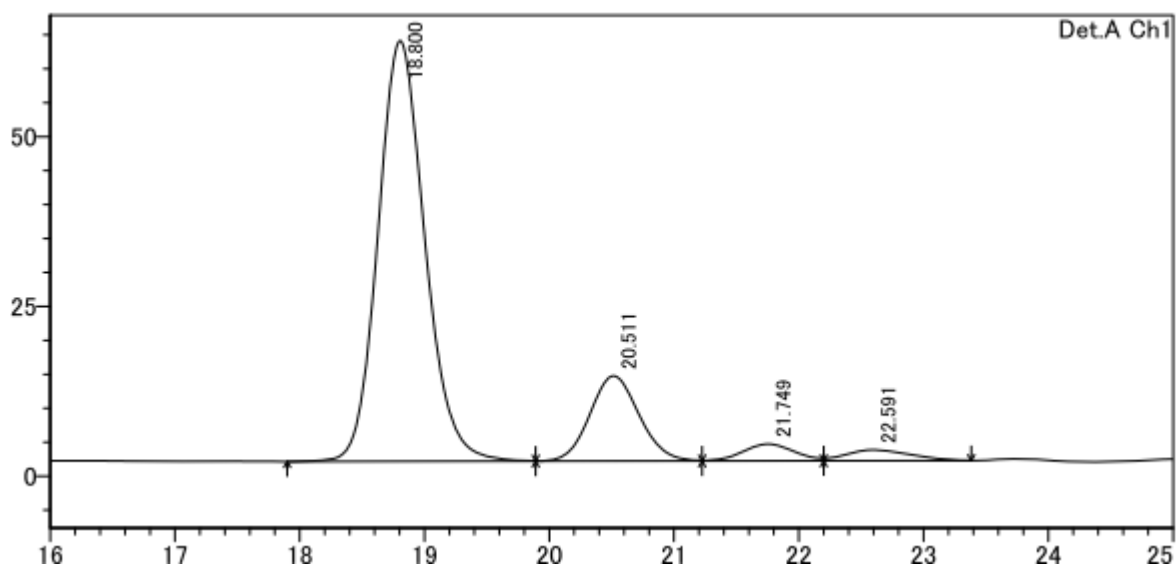

| Peak | Retention Time | Area    | High  | Area Percent |
|------|----------------|---------|-------|--------------|
| 1    | 18.800         | 1615766 | 61932 | 77.462       |
| 2    | 20.511         | 343559  | 12545 | 16.471       |
| 3    | 21.749         | 70188   | 2478  | 3.365        |
| 4    | 22.591         | 56360   | 1593  | 2.702        |
| 合計   |                | 2085873 | 78548 | 100.000      |

1-(4-fluorophenyl)-2-(1-phenylallyl)butane-1,3-dione (4f)



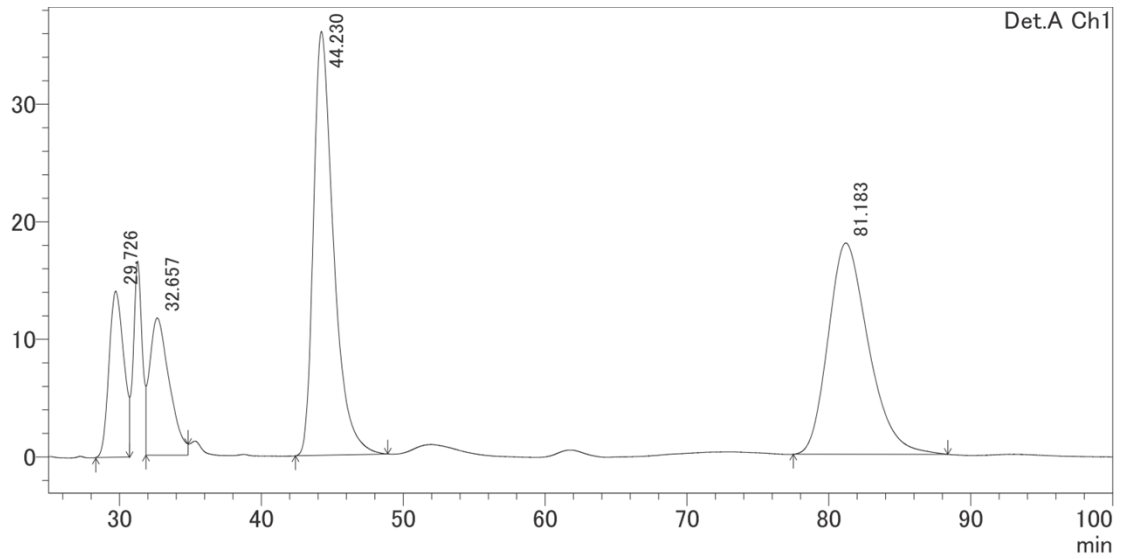

Peak Table

| Peak | Retention Time | Area    | High  | Area Percent |
|------|----------------|---------|-------|--------------|
| 1    | 29.726         | 993501  | 13907 | 10.958       |
| 2    | 32.657         | 976991  | 11009 | 10.776       |
| 3    | 44.230         | 3546201 | 36052 | 39.114       |
| 4    | 81.183         | 3549673 | 17969 | 39.152       |
| 合計   |                | 9066366 | 78937 | 100.000      |

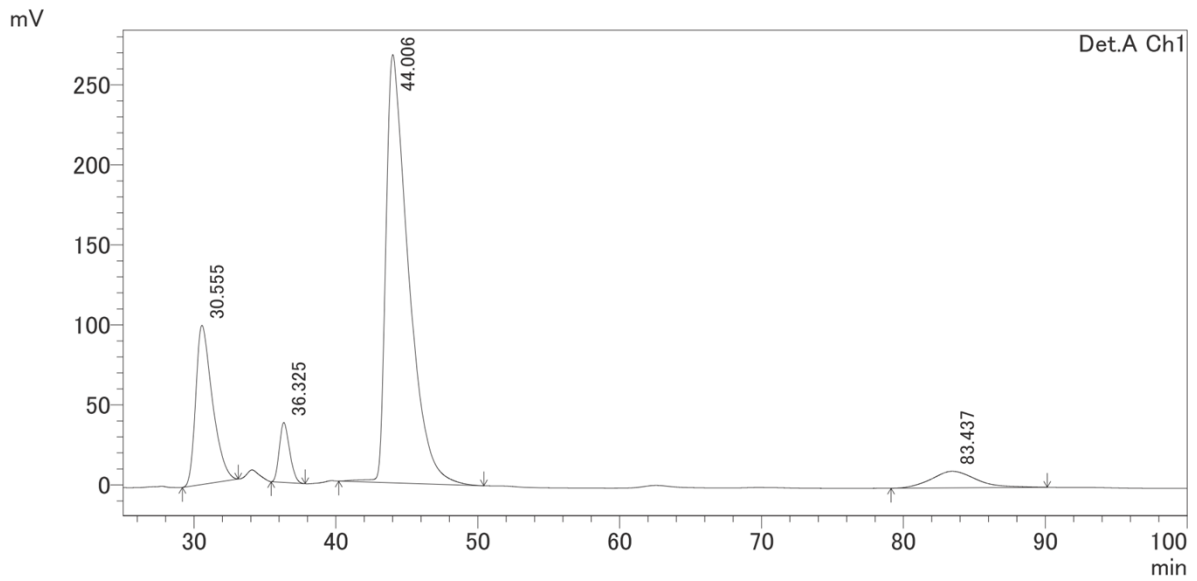

Peak Table

| Peak | Retention Time | Area     | High   | Area Percent |
|------|----------------|----------|--------|--------------|
| 1    | 30.555         | 8126337  | 99485  | 19.464       |
| 2    | 36.325         | 1885612  | 37504  | 4.516        |
| 3    | 44.006         | 29455604 | 267633 | 70.550       |
| 4    | 83.437         | 2283763  | 10376  | 5.470        |
| 合計   |                | 41751317 | 414999 | 100.000      |

**1-(naphthalen-2-yl)-2-(1-phenylallyl)butane-1,3-dione (4g)**

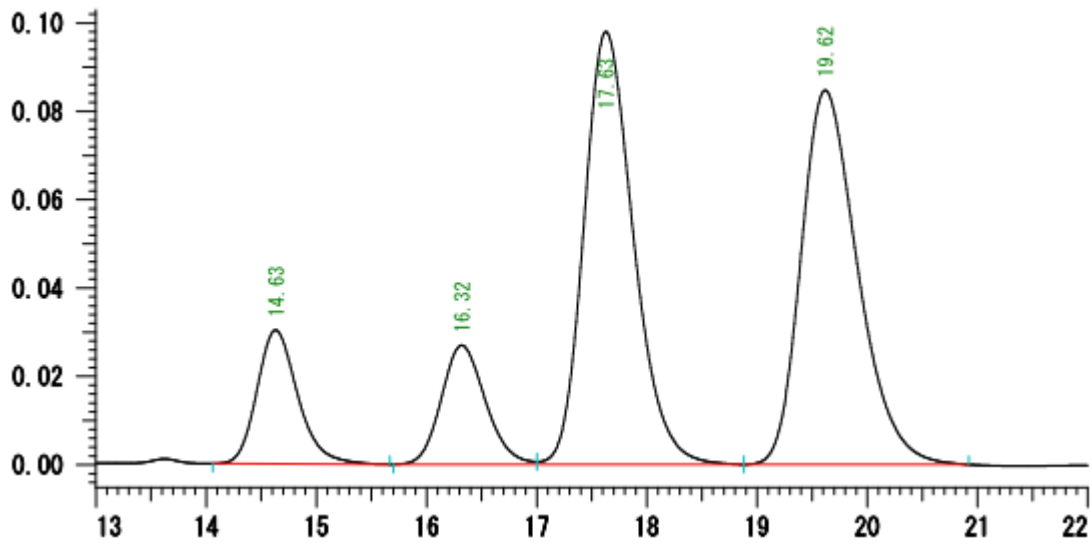

| NO | RT    | 面積      | 濃度1     | BC |
|----|-------|---------|---------|----|
| 1  | 14.63 | 387326  | 10.201  | BB |
| 2  | 16.32 | 374820  | 9.871   | BV |
| 3  | 17.63 | 1525036 | 40.164  | VB |
| 4  | 19.62 | 1509885 | 39.764  | BB |
|    |       | 3797067 | 100.000 |    |

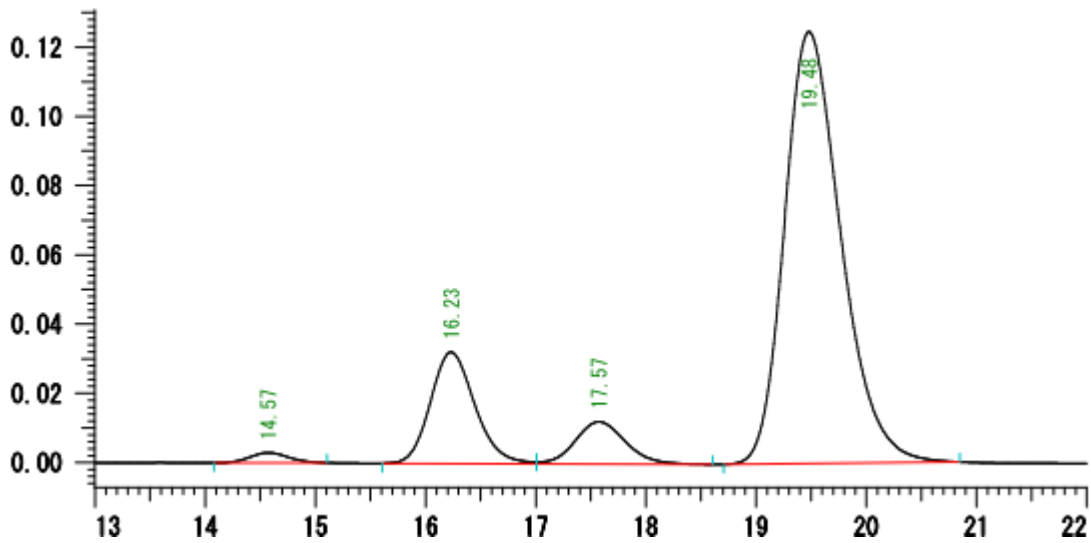

| NO | RT    | 面積      | 濃度1     | BC |
|----|-------|---------|---------|----|
| 1  | 14.57 | 35923   | 1.238   | BB |
| 2  | 16.23 | 451832  | 15.575  | BV |
| 3  | 17.57 | 192332  | 6.630   | VB |
| 4  | 19.48 | 2220927 | 76.557  | BB |
|    |       | 2901014 | 100.000 |    |

1-(naphthalen-1-yl)-2-(1-phenylallyl)butane-1,3-dione (4h)

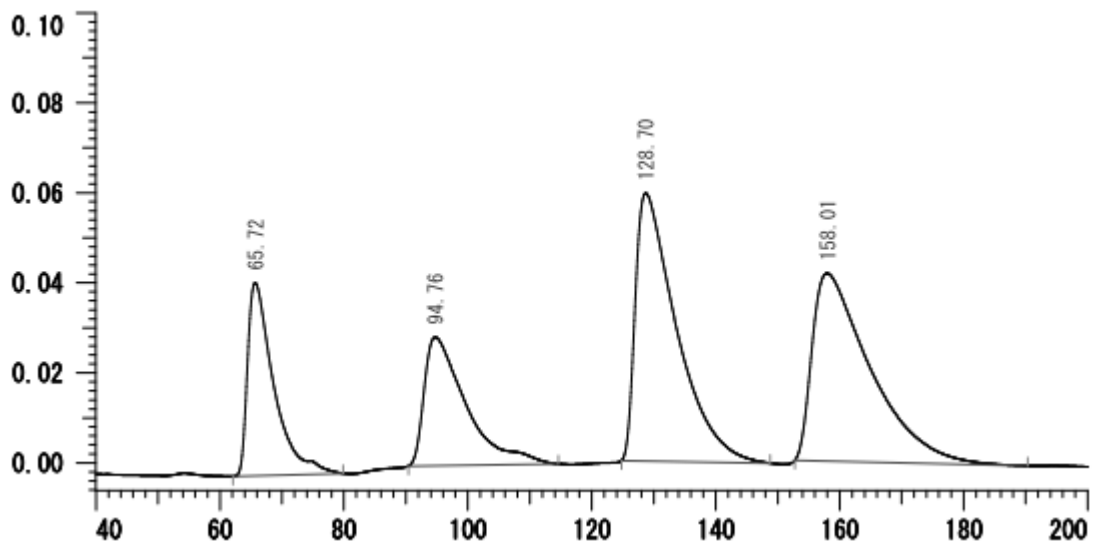

| NO | RT     | 面積       | 濃度1      | BC      |
|----|--------|----------|----------|---------|
| 1  | 65.72  | 6222124  | 15.555   | MC      |
| 2  | 94.76  | 6648510  | 16.621   | MC      |
| 3  | 128.70 | 13618554 | 34.046   | MC      |
| 4  | 158.01 | 13511486 | 33.778   | MC      |
|    |        |          | 40000674 | 100.000 |

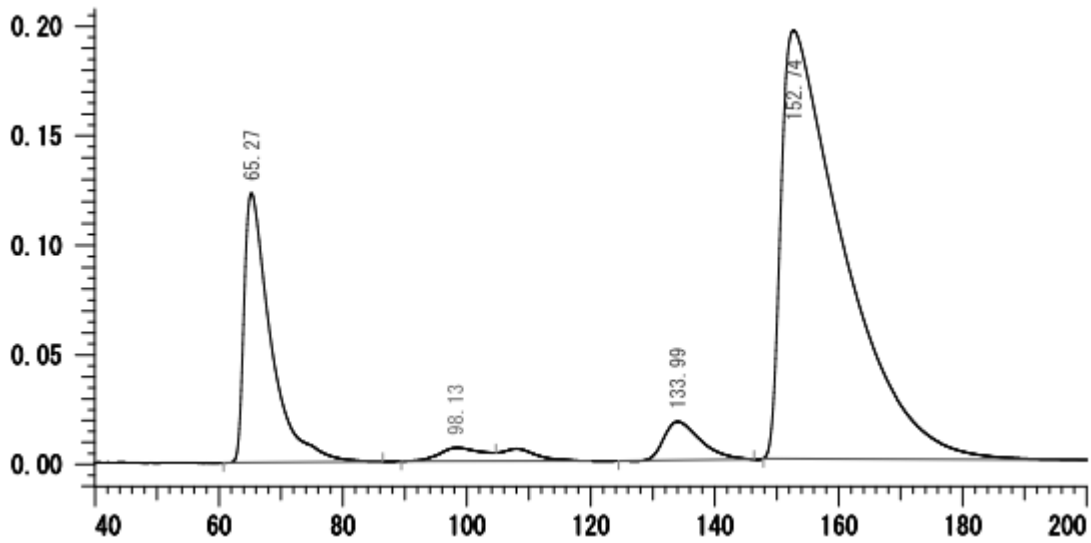

| NO | RT     | 面積       | 濃度1      | BC      |
|----|--------|----------|----------|---------|
| 1  | 65.27  | 18116972 | 19.766   | MC      |
| 2  | 98.13  | 1510369  | 1.648    | MC      |
| 3  | 133.99 | 3586357  | 3.913    | MC      |
| 4  | 152.74 | 68444175 | 74.674   | MC      |
|    |        |          | 91657873 | 100.000 |

4,4-dimethyl-1-phenyl-2-(1-phenylallyl)pentane-1,3-dione (4i)

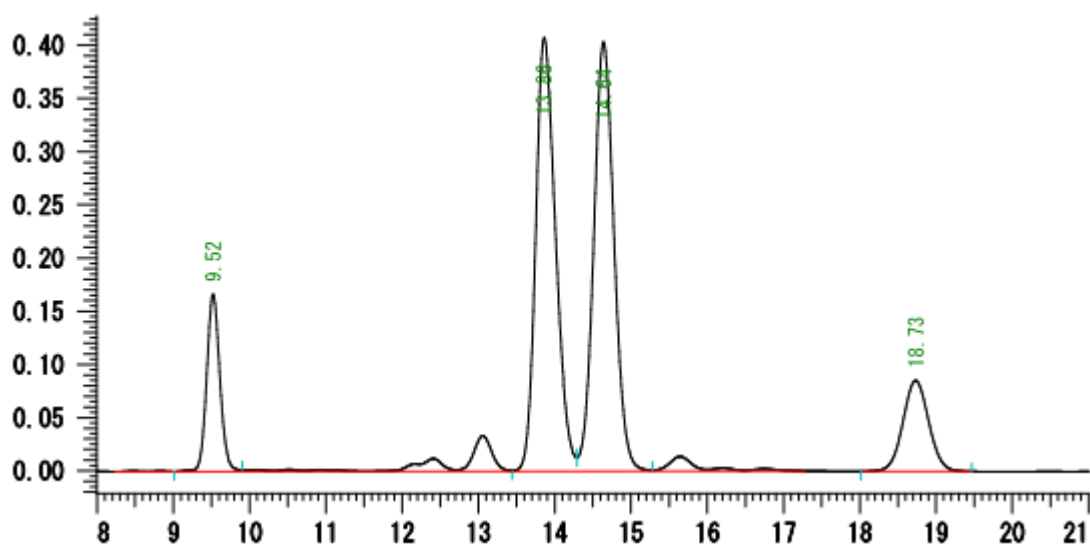

| NO      | RT    | 面積      | 濃度1     | BC |
|---------|-------|---------|---------|----|
| 1       | 9.52  | 1001642 | 10.632  | BV |
| 2       | 13.86 | 3690076 | 39.170  | VV |
| 3       | 14.64 | 3726234 | 39.554  | VV |
| 4       | 18.73 | 1002751 | 10.644  | BB |
| 9420703 |       |         | 100.000 |    |

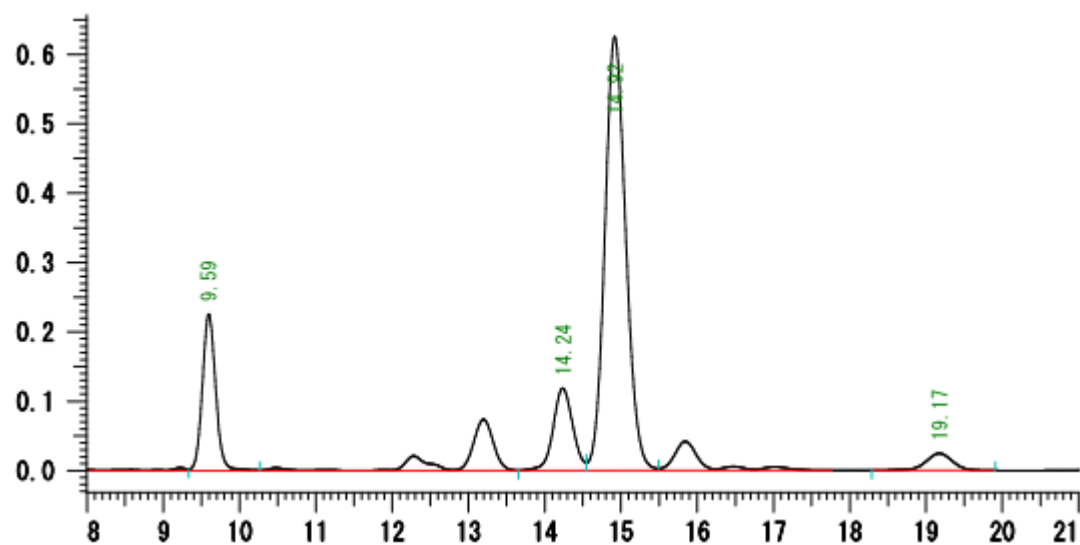

| NO      | RT    | 面積      | 濃度1     | BC |
|---------|-------|---------|---------|----|
| 1       | 9.59  | 1387654 | 15.906  | VV |
| 2       | 14.24 | 1068516 | 12.248  | VV |
| 3       | 14.92 | 5960807 | 68.326  | VV |
| 4       | 19.17 | 307059  | 3.520   | BB |
| 8724036 |       |         | 100.000 |    |

4-methyl-1-phenyl-2-(1-phenylallyl)pentane-1,3-dione (4j)

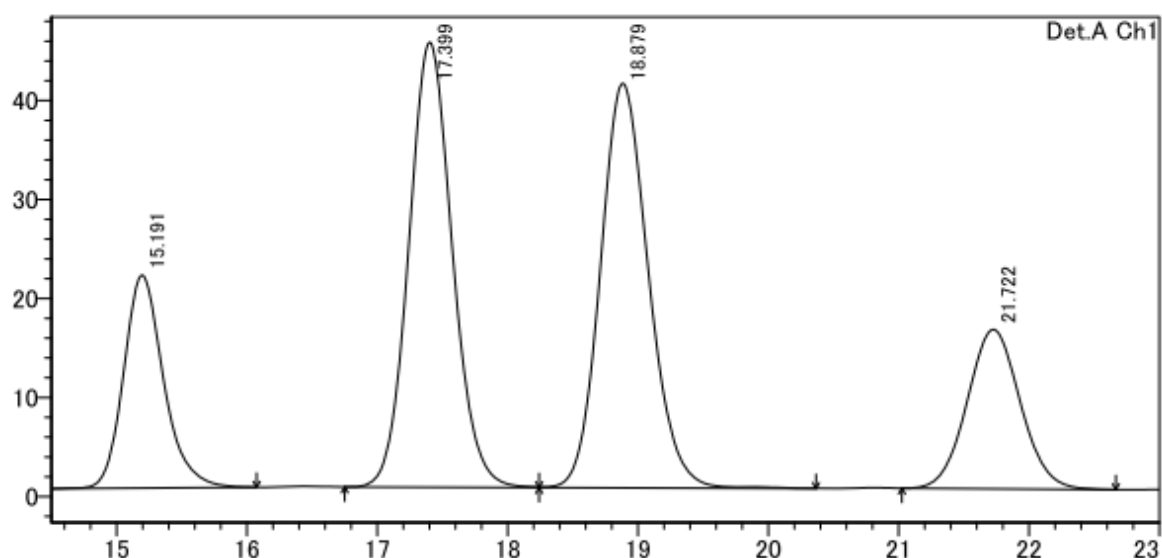

| Peak | Retention Time | Area    | High   | Area Percent |
|------|----------------|---------|--------|--------------|
| 1    | 15.191         | 458349  | 21498  | 15.271       |
| 2    | 17.399         | 1043075 | 44924  | 34.753       |
| 3    | 18.879         | 1044223 | 40843  | 34.791       |
| 4    | 21.722         | 455773  | 16088  | 15.185       |
| 合計   |                | 3001419 | 123353 | 100.000      |

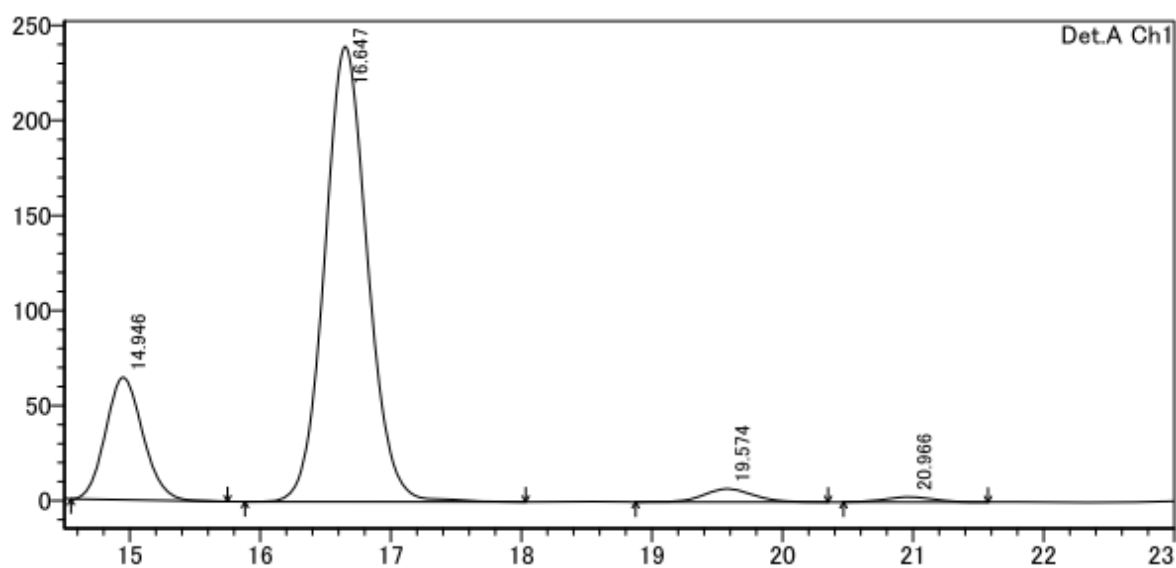

| Peak | Retention Time | Area    | High   | Area Percent |
|------|----------------|---------|--------|--------------|
| 1    | 14.946         | 1280568 | 64378  | 18.268       |
| 2    | 16.647         | 5477475 | 239488 | 78.139       |
| 3    | 19.574         | 182166  | 6948   | 2.599        |
| 4    | 20.966         | 69735   | 2687   | 0.995        |
| 合計   |                | 7009944 | 313500 | 100.000      |

1-phenyl-2-(1-phenylallyl)pentane-1,3-dione (4k)

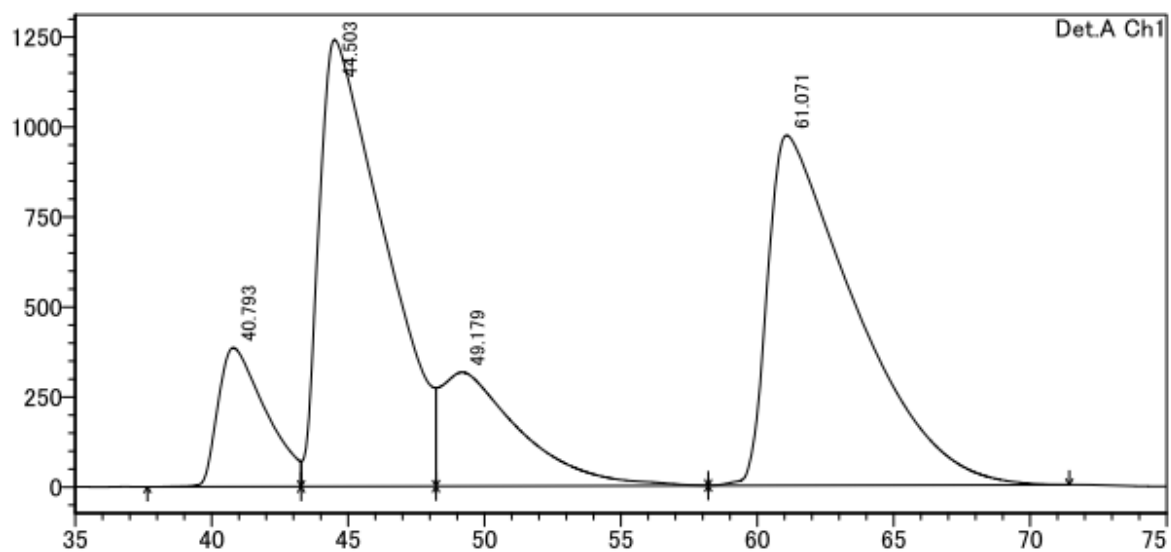

| Peak | Retention Time | Area      | High    | Area Percent |
|------|----------------|-----------|---------|--------------|
| 1    | 40.793         | 46919211  | 385782  | 8.765        |
| 2    | 44.503         | 207242047 | 1240786 | 38.714       |
| 3    | 49.179         | 63862212  | 316390  | 11.930       |
| 4    | 61.071         | 217289790 | 972556  | 40.591       |
| 合計   |                | 535313260 | 2915514 | 100.000      |

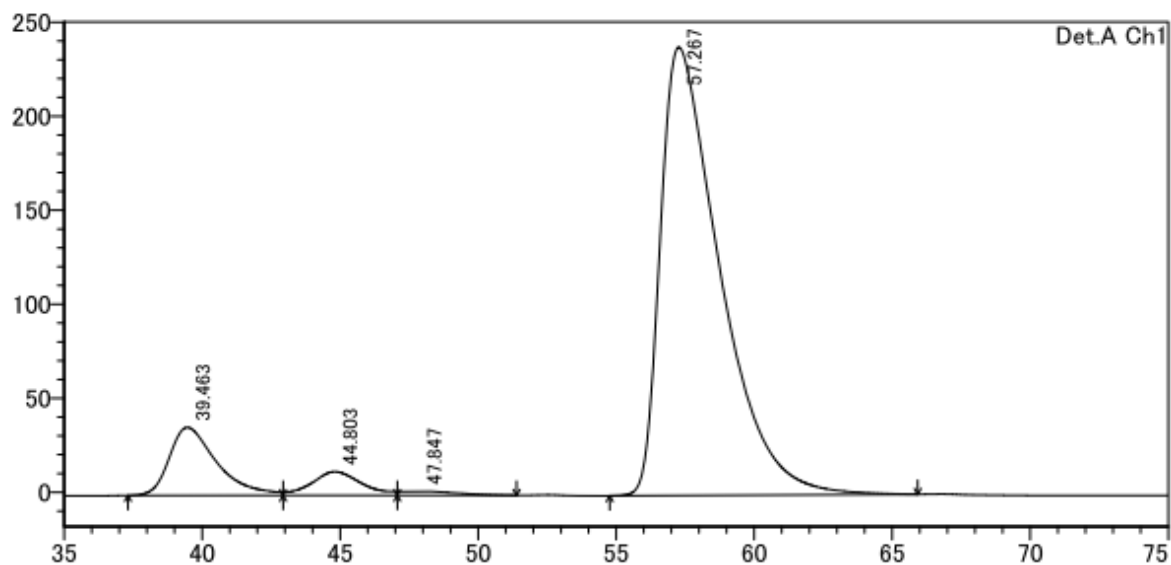

| Peak | Retention Time | Area     | High   | Area Percent |
|------|----------------|----------|--------|--------------|
| 1    | 39.463         | 4308659  | 36168  | 10.315       |
| 2    | 44.803         | 1563219  | 12593  | 3.742        |
| 3    | 47.847         | 298351   | 2152   | 0.714        |
| 4    | 57.267         | 35599716 | 238361 | 85.228       |
| 合計   |                | 41769946 | 289275 | 100.000      |

1-phenyl-2-(1-phenylallyl)heptane-1,3-dione (4I)

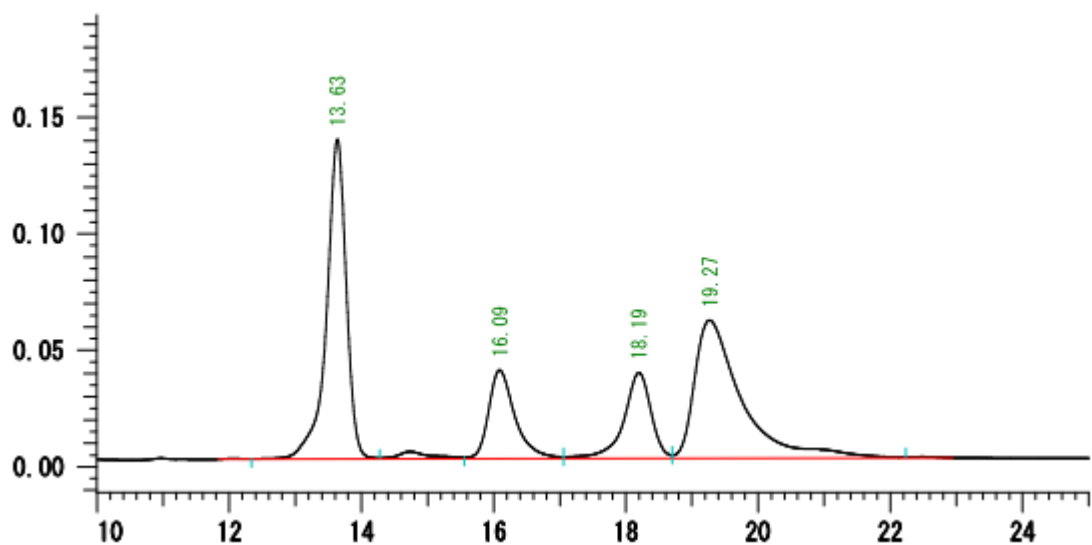

| NO | RT    | 面積      | 濃度1     | BC |
|----|-------|---------|---------|----|
| 1  | 13.63 | 1445303 | 36.631  | BV |
| 2  | 16.09 | 523356  | 13.264  | VV |
| 3  | 18.19 | 523444  | 13.267  | VV |
| 4  | 19.27 | 1453503 | 36.839  | VV |
|    |       | 3945606 | 100.000 |    |

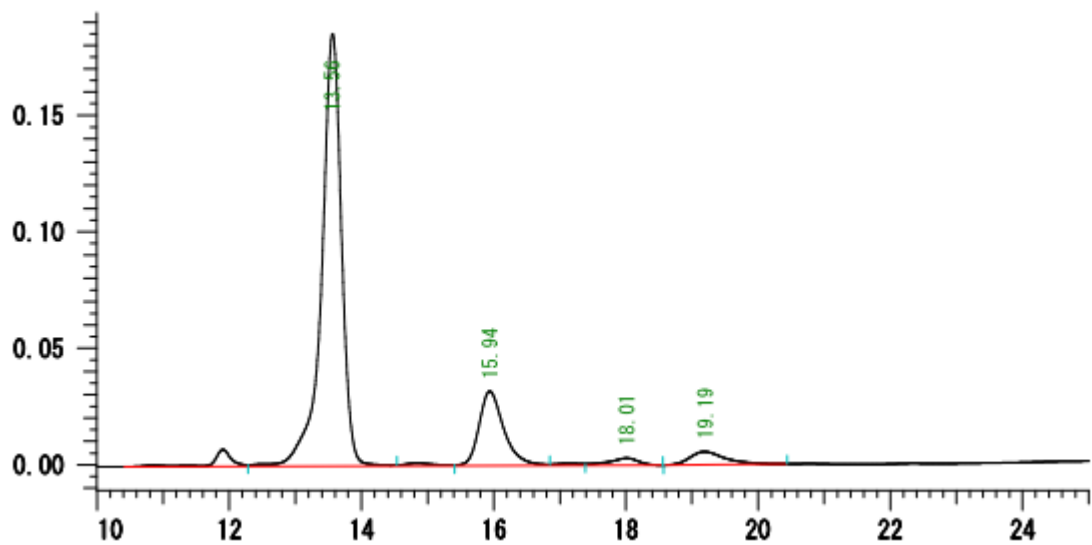

| NO | RT    | 面積      | 濃度1     | BC |
|----|-------|---------|---------|----|
| 1  | 13.56 | 1958772 | 77.645  | VV |
| 2  | 15.94 | 413146  | 16.377  | VV |
| 3  | 18.01 | 46663   | 1.850   | VB |
| 4  | 19.19 | 104135  | 4.128   | BB |
|    |       | 2522716 | 100.000 |    |

5,5-dimethyl-3-(1-phenylallyl)hexane-2,4-dione (4m)

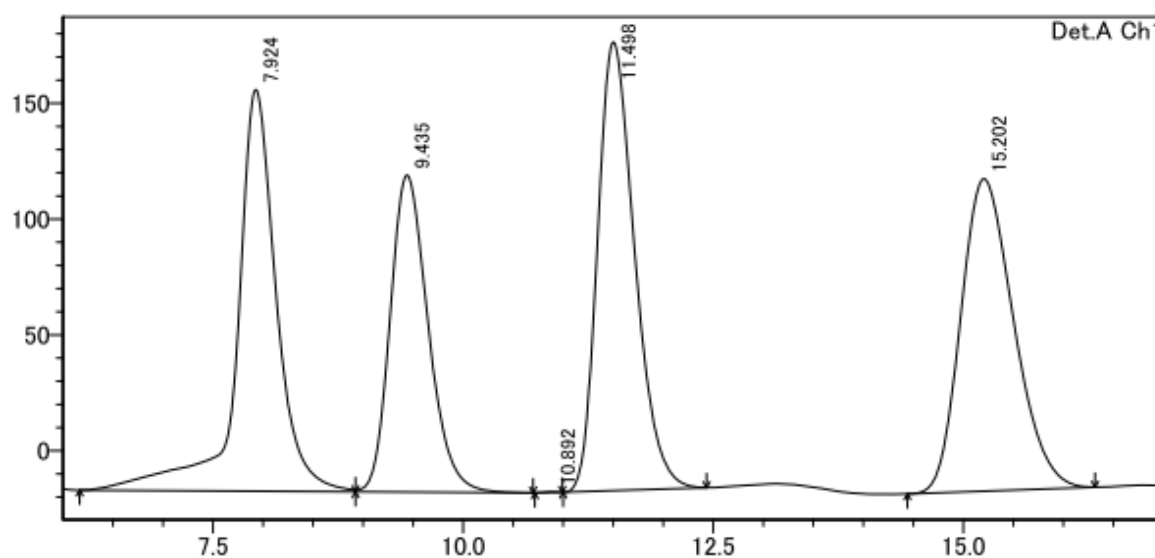

| Peak | Retention Time | Area     | High   | Area Percent |
|------|----------------|----------|--------|--------------|
| 1    | 7.924          | 4779124  | 173343 | 26.086       |
| 2    | 9.435          | 3606999  | 136822 | 19.688       |
| 3    | 10.892         | 2359     | 269    | 0.013        |
| 4    | 11.498         | 4988885  | 193622 | 27.231       |
| 5    | 15.202         | 4943359  | 134847 | 26.982       |
| 合計   |                | 18320727 | 638902 | 100.000      |

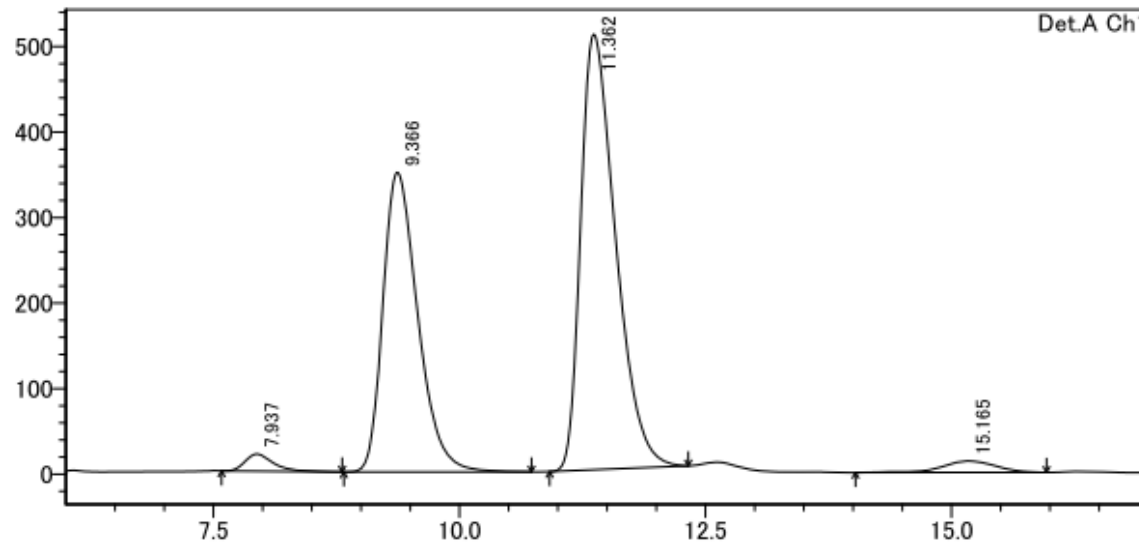

| Peak | Retention Time | Area     | High   | Area Percent |
|------|----------------|----------|--------|--------------|
| 1    | 7.937          | 400597   | 20046  | 1.813        |
| 2    | 9.366          | 8620138  | 350151 | 39.010       |
| 3    | 11.362         | 12575151 | 509185 | 56.908       |
| 4    | 15.165         | 501256   | 13196  | 2.268        |
| 合計   |                | 22097142 | 892578 | 100.000      |



1-phenyl-2-(1-phenylallyl)butane-1,3-diol (6a)

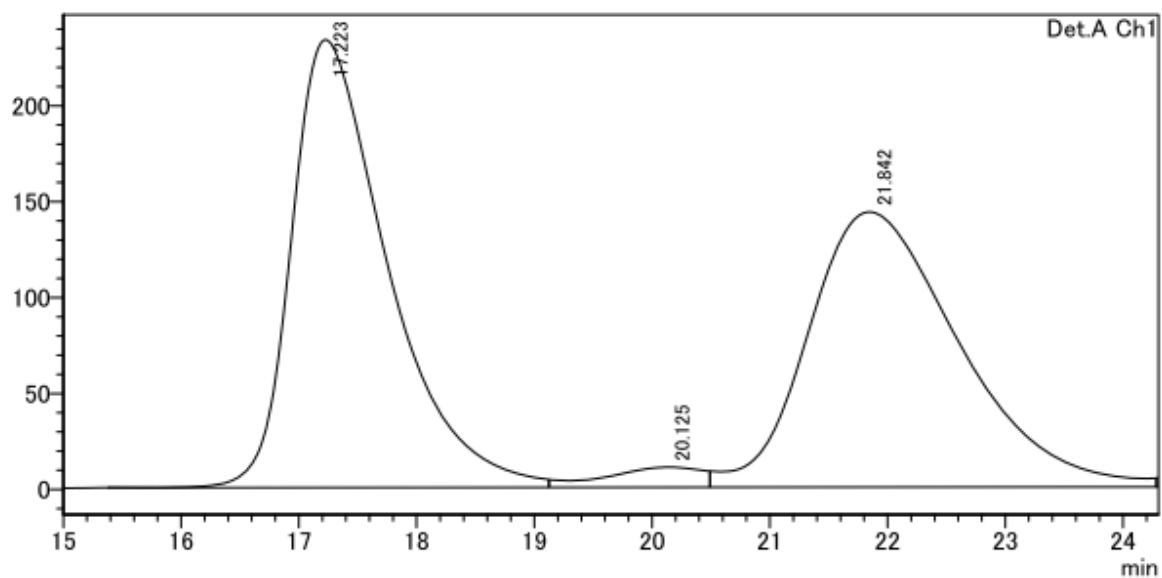

| Peak | Retention Time | Area     | High   | Area Percent |
|------|----------------|----------|--------|--------------|
| 1    | 17.223         | 13197490 | 233377 | 48.787       |
| 2    | 20.125         | 586623   | 10379  | 2.169        |
| 3    | 21.842         | 12780845 | 143414 | 47.247       |
| 4    | 24.740         | 486435   | 11035  | 1.798        |
| 合計   |                | 27051392 | 398206 | 100.000      |

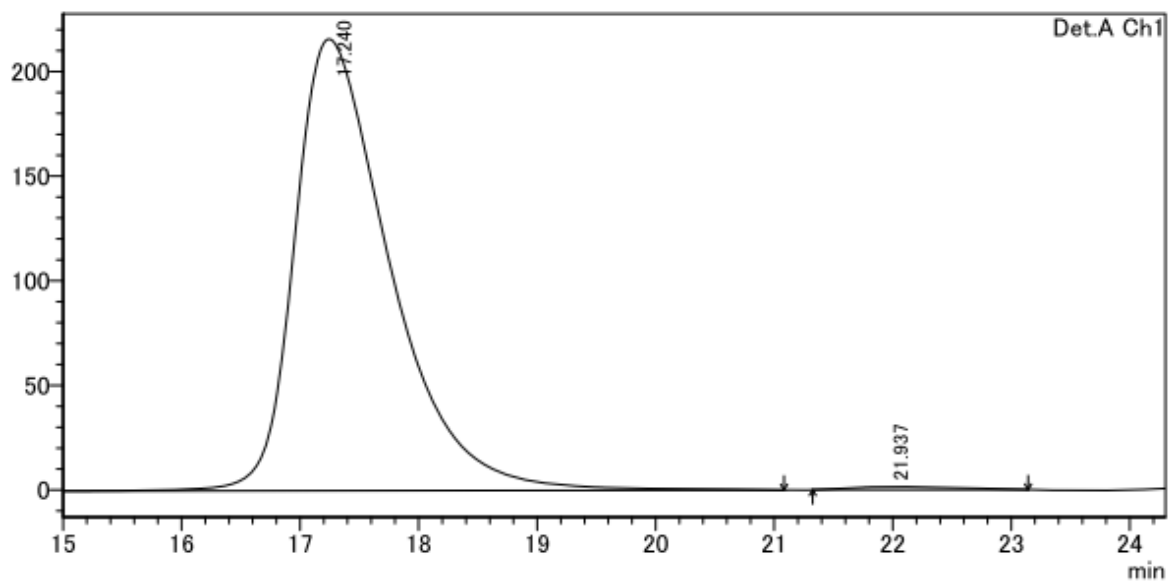

| Peak | Retention Time | Area     | High   | Area Percent |
|------|----------------|----------|--------|--------------|
| 1    | 17.240         | 12091384 | 215877 | 99.272       |
| 2    | 21.937         | 88614    | 1315   | 0.728        |
| 合計   |                | 12179998 | 217192 | 100.000      |

1. (a) N. Dodo, Y. Matsushima, M. Uno, K. Onitsuka and S. Takahashi, *J. Chem. Soc. Dalton Trans.*, 2000, 35-41; (b) E. Matsushima, N. Komatsuzaki, Y. Ajioka, M. Yamamoto, H. Kikuchi, Y. Takata, N. Dodo, K. Onitsuka, M. Uno and S. Takahashi, *Bull. Chem. Soc. Jpn.*, 2001, **74**, 527-537; (c) N. Kanbayashi and K. Onitsuka, *Angew. Chem. Int. Ed.*, 2011, **50**, 5197-5199.
2. E. J. Corey, C. U. Kim and M. Takeda, *Tetrahedron Lett.*, 1972, **13**, 4339-4342.
3. X. Sun, P. Li, X. Zhang and L. Wang, *Org. Lett.*, 2014, **16**, 2126-2129.
4. X. Sun, Y. Lyu, D. Zhang-Negrerie, Y. Du and K. Zhao, *Org. Lett.*, 2013, **15**, 6222-6225.
5. M. Sada and S. Matsubara, *J. Am. Chem. Soc.*, 2010, **132**, 432-433.
6. M. Sada, T. Furuyama, S. Komagawa, M. Uchiyama and S. Matsubara, *Chemistry – A European Journal*, 2010, **16**, 10474-10481.
7. D. Lim, F. Fang, G. Zhou and D. M. Coltart, *Org. Lett.*, 2007, **9**, 4139-4142.
8. T. Ishikawa, R. Kadoya, M. Arai, H. Takahashi, Y. Kaisi, T. Mizuta, K. Yoshikai and S. Saito, *The Journal of Organic Chemistry*, 2001, **66**, 8000-8009.
9. R. Balamurugan and S. Manojveer, *Chem. Commun.*, 2011, **47**, 11143-11145.
10. D. Saha, R. Ghosh, R. Dutta, A. K. Mandal and A. Sarkar, *J. Organomet. Chem.*, 2015, **776**, 89-97.
